# Supplementary material for: Benzimidazole based Pt(ii) complexes with better normal cell viability than cisplatin: synthesis, substitution behavior, cytotoxicity, DNA binding and DFT study
Source: Royal Society of Chemistry journal article supplement (doi:10.1039/c6ra17788c), 2016-01-01
Supplement: c6ra17788c1.pdf [file c6ra17788c1.pdf]

## Electronic Supplementary Information

### Benzimidazole based Pt(II) complexes with better normal cell viability than *cisplatin*: Synthesis, substitution behavior, cytotoxicity, DNA binding and DFT study

Ishani Mitra<sup>a</sup>, Subhajit Mukherjee<sup>a</sup>, Venkata P. Reddy B.<sup>a</sup>, Subrata Dasgupta<sup>a</sup>, Jagadeesh C. Bose K.<sup>b</sup>, Sandip Mukherjee<sup>c</sup>, Wolfgang Linert<sup>d</sup> and Sankar Ch. Moi<sup>\*a</sup>

|    |                     |                                                                                                                                                                                                                              |
|----|---------------------|------------------------------------------------------------------------------------------------------------------------------------------------------------------------------------------------------------------------------|
| 1  | <b>ESI Fig. S1</b>  | IR spectra of complex <b>1</b>                                                                                                                                                                                               |
| 2  | <b>ESI Fig. S2</b>  | <sup>1</sup> H NMR spectra of complex <b>1</b> in DMSO-D <sub>6</sub> as solvent                                                                                                                                             |
| 3  | <b>ESI Fig. S3</b>  | <sup>13</sup> C NMR spectra of complex <b>1</b>                                                                                                                                                                              |
| 4  | <b>ESI Fig. S4</b>  | IR spectra of complex <b>2</b>                                                                                                                                                                                               |
| 5  | <b>ESI Fig. S5</b>  | <sup>1</sup> H NMR spectra of complex <b>2</b> in DMSO-D <sub>6</sub> as solvent                                                                                                                                             |
| 6  | <b>ESI Fig. S6</b>  | Job's plot for the formation of complex <b>3</b>                                                                                                                                                                             |
| 7  | <b>ESI Fig. S7</b>  | Job's plot for the formation of complex <b>4</b>                                                                                                                                                                             |
| 8  | <b>ESI Fig. S8</b>  | Spectral difference between complex <b>2</b> and <b>3</b>                                                                                                                                                                    |
| 9  | <b>ESI Fig. S9</b>  | Spectral difference between complex <b>2</b> and <b>4</b>                                                                                                                                                                    |
| 10 | <b>ESI Fig. S10</b> | IR spectra of complex <b>3</b>                                                                                                                                                                                               |
| 11 | <b>ESI Fig. S11</b> | <sup>1</sup> H NMR spectra of complex <b>3</b> in DMSO-D <sub>6</sub> as solvent                                                                                                                                             |
| 12 | <b>ESI Fig. S12</b> | ESI Mass spectrum of complex <b>3</b> in water                                                                                                                                                                               |
| 13 | <b>ESI Fig. S13</b> | IR spectra of complex <b>4</b>                                                                                                                                                                                               |
| 14 | <b>ESI Fig. S14</b> | <sup>1</sup> H NMR spectra of complex <b>4</b> in D <sub>2</sub> O as solvent                                                                                                                                                |
| 15 | <b>ESI Fig. S15</b> | ESI Mass spectrum of complex <b>4</b> in water                                                                                                                                                                               |
| 16 | <b>ESI Fig. S16</b> | Major contribution of molecular orbitals involved in electronic transitions in complex <b>1</b>                                                                                                                              |
| 17 | <b>ESI Fig. S17</b> | A typical plot of ln(A <sub>∞</sub> - A <sub>t</sub> ) versus time (min): [complex <b>2</b> ] = 1.50 × 10 <sup>-4</sup> M; [GSH] = 1.50 × 10 <sup>-3</sup> M; temperature = 25 °C, inset: typical plot of ln Δ vs time (min) |
| 18 | <b>ESI Fig. S18</b> | Plot of 10 <sup>3</sup> k <sub>1(obs)</sub> versus 10 <sup>3</sup> [DL-pen] from temperature 25 to 45 °C                                                                                                                     |
| 19 | <b>ESI Fig. S19</b> | Plot of 10 <sup>3</sup> k <sub>1(obs)</sub> versus 10 <sup>3</sup> [GSH] from temperature 25 to 45 °C                                                                                                                        |
| 20 | <b>ESI Fig. S20</b> | Plot of 1/10 <sup>3</sup> × k <sub>1(obs)</sub> versus 1/10 <sup>3</sup> [GSH] at different temperatures                                                                                                                     |
| 21 | <b>ESI Fig. S21</b> | Eyring plot (ln k <sub>1h</sub> /k <sub>B</sub> T vs. 10 <sup>3</sup> /T) for the reaction of complex <b>2</b> with DL-pen                                                                                                   |
| 22 | <b>ESI Fig. S22</b> | Eyring plot (ln k <sub>2h</sub> /k <sub>B</sub> T vs. 10 <sup>3</sup> /T) for the reaction of complex <b>2</b> with DL-pen                                                                                                   |
| 23 | <b>ESI Fig. S23</b> | Eyring plot (ln k <sub>1h</sub> /k <sub>B</sub> T vs. 10 <sup>3</sup> /T) for the reaction of complex <b>2</b> with GSH                                                                                                      |
| 24 | <b>ESI Fig. S24</b> | Eyring plot (ln k <sub>2h</sub> /k <sub>B</sub> T vs. 10 <sup>3</sup> /T) for the reaction of complex <b>2</b> with GSH                                                                                                      |
| 25 | <b>ESI Fig. S25</b> | Optimised structures of complexes <b>2-4</b>                                                                                                                                                                                 |
| 26 | <b>ESI Fig. S26</b> | Optimised structures of probable complex <b>3'</b> (S,N) and probable complex <b>4'</b> (S,N)                                                                                                                                |
| 27 | <b>ESI Fig. S27</b> | UV spectra of <b>3</b> (20 μM) in Tris-HCl buffer in the presence of increasing amounts of CT-DNA(0-200 μM). Inset: linear fit of [DNA]/[ε <sub>a</sub> -ε <sub>f</sub> ] vs. [DNA]                                          |
| 28 | <b>ESI Fig. S28</b> | UV spectra of <b>4</b> (20 μM) in Tris-HCl buffer in the presence of increasing amounts of CT-DNA(0-200 μM). Inset: linear fit of [DNA]/[ε <sub>a</sub> -ε <sub>f</sub> ] vs. [DNA]                                          |
| 29 | <b>ESI Fig. S29</b> | Emission spectra of EtBr-bound DNA solutions in the absence and presence of increasing concentrations of <b>3</b> . Inset: Stern-Volmer plot of the fluorescence data                                                        |
| 30 | <b>ESI Fig. S30</b> | Emission spectra of EtBr-bound DNA solutions in the absence and presence of increasing concentrations of <b>4</b> . Inset: Stern-Volmer plot of the fluorescence data                                                        |
| 31 | <b>ESI Fig. S31</b> | Scatchard plots for complexes <b>2-4</b>                                                                                                                                                                                     |
| 32 | <b>ESI Fig. S32</b> | Magnified view of the docked models showing the interaction of complexes <b>2-4</b> with DNA base pairs                                                                                                                      |
| 33 | <b>ESI Fig. S33</b> | Agarose gel electrophoresis pattern of plasmid DNA treated with cisplatin and complexes                                                                                                                                      |

|    |                     |                                                                                                                                                                                                                                       |
|----|---------------------|---------------------------------------------------------------------------------------------------------------------------------------------------------------------------------------------------------------------------------------|
|    |                     | <b>2-4</b>                                                                                                                                                                                                                            |
| 34 | <b>ESI Fig. S34</b> | Microscopic images of untreated and complex treated HeLa cells                                                                                                                                                                        |
| 35 | <b>ESI Fig. S35</b> | Microscopic images of untreated and complex treated A549 cells                                                                                                                                                                        |
| 36 | <b>ESI Fig. S36</b> | Percentage of cell survivability and ROS production in mice liver cells after 4h incubation with 50 $\mu$ M of cisplatin and complexes <b>2-4</b> .                                                                                   |
| 37 | <b>ESI Table S1</b> | $10^3 \times k_{1(\text{obs})}$ ( $s^{-1}$ ) values at different [DL-pen] and [GSH] at different temperatures. [Complex <b>2</b> ] = $1.50 \times 10^{-4}$ M, pH = 4.0, ionic strength = 0.1 M NaClO <sub>4</sub>                     |
| 38 | <b>ESI Table S2</b> | $10^5 \times k_{2(\text{obs})}$ ( $s^{-1}$ ) values at different [DL-pen] and [GSH] at different temperatures; [Complex <b>2</b> ] = $1.50 \times 10^{-4}$ mol.dm <sup>-3</sup> , pH = 4.0, ionic strength = 0.1 M NaClO <sub>4</sub> |
| 39 | <b>ESI Table S3</b> | Activation parameters of analogous systems                                                                                                                                                                                            |
| 40 | <b>ESI Table S4</b> | Charges (a.u.) and electron configurations for the complexes <b>3</b> (S, O) and <b>3'</b> (S, N)                                                                                                                                     |
| 41 | <b>ESI Table S5</b> | Charges (a.u.) and electron configurations for the complexes <b>4</b> (S, O) and <b>4'</b> (S, N)                                                                                                                                     |
| 42 | <b>ESI Table S6</b> | Hydrogen bonding interactions and the binding free energy of the most stable docking conformations for complexes <b>2-4</b> docked into DNA                                                                                           |

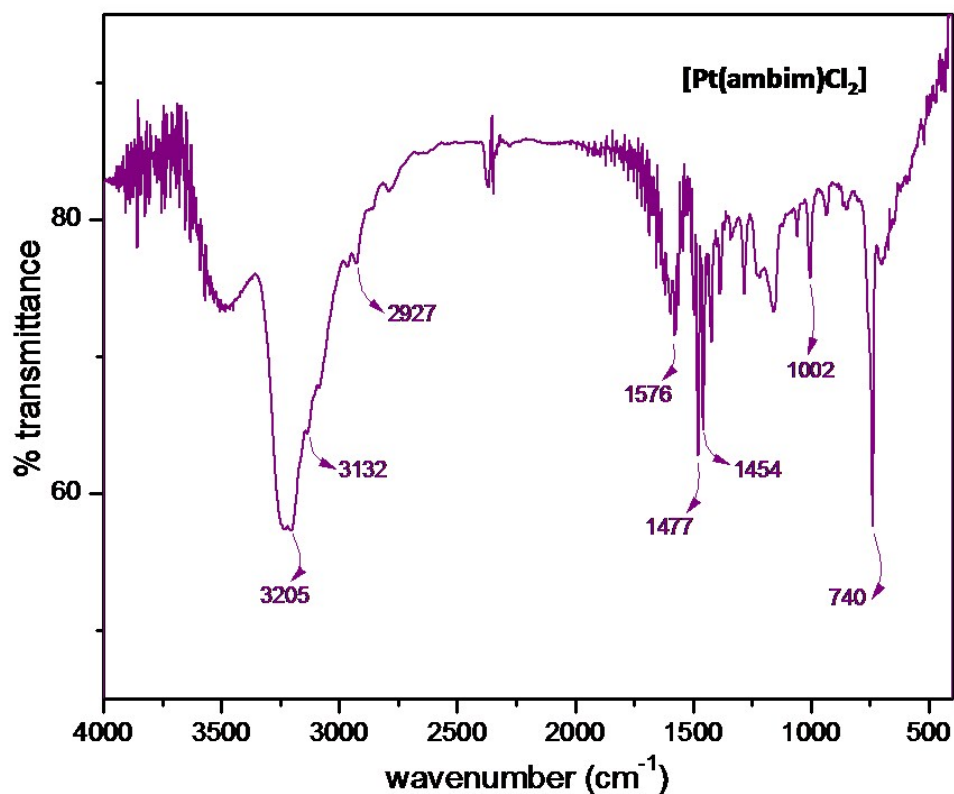

ESI Fig. S1 IR spectra of complex 1

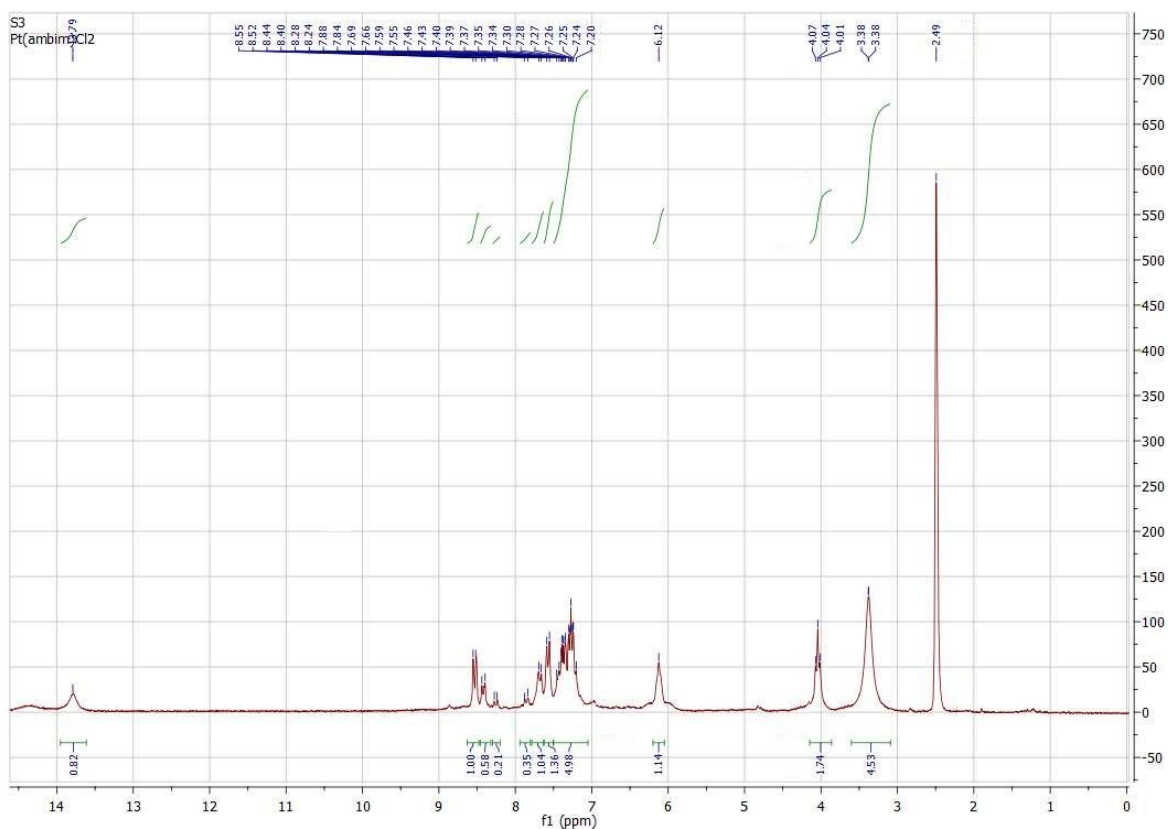

ESI Fig. S2 <sup>1</sup>H NMR spectra of complex **1** in DMSO-D<sub>6</sub> as solvent

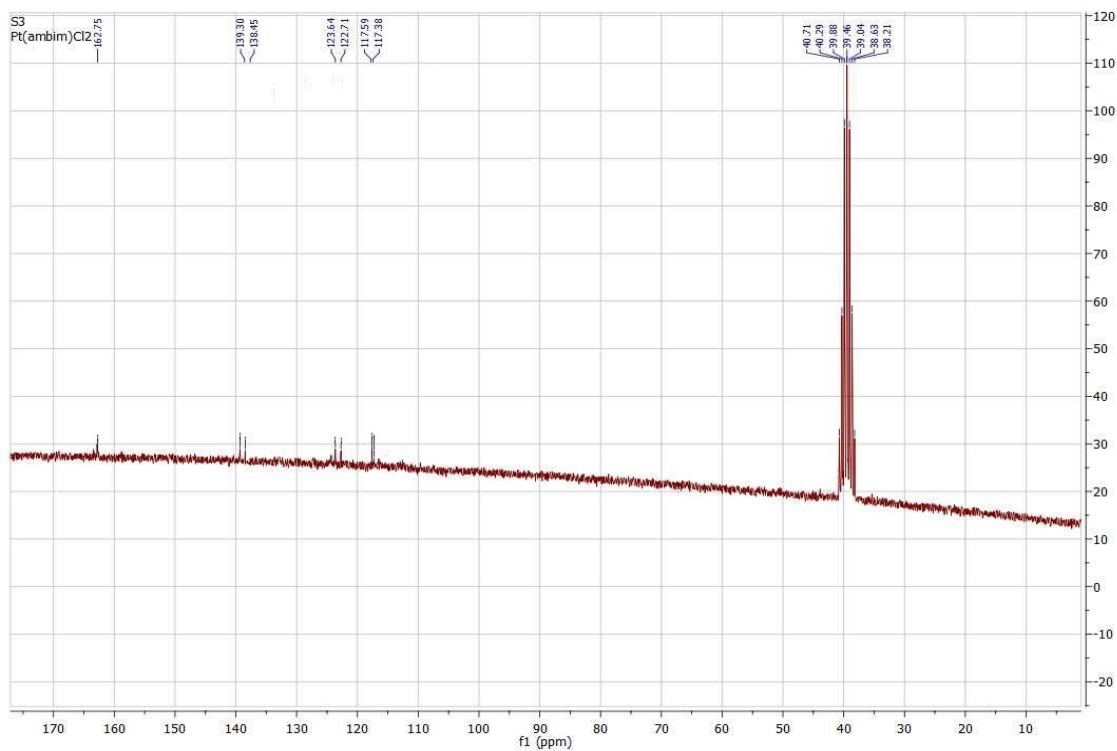

ESI Fig. S3 <sup>13</sup>C NMR spectra of complex **1** in DMSO-D<sub>6</sub>

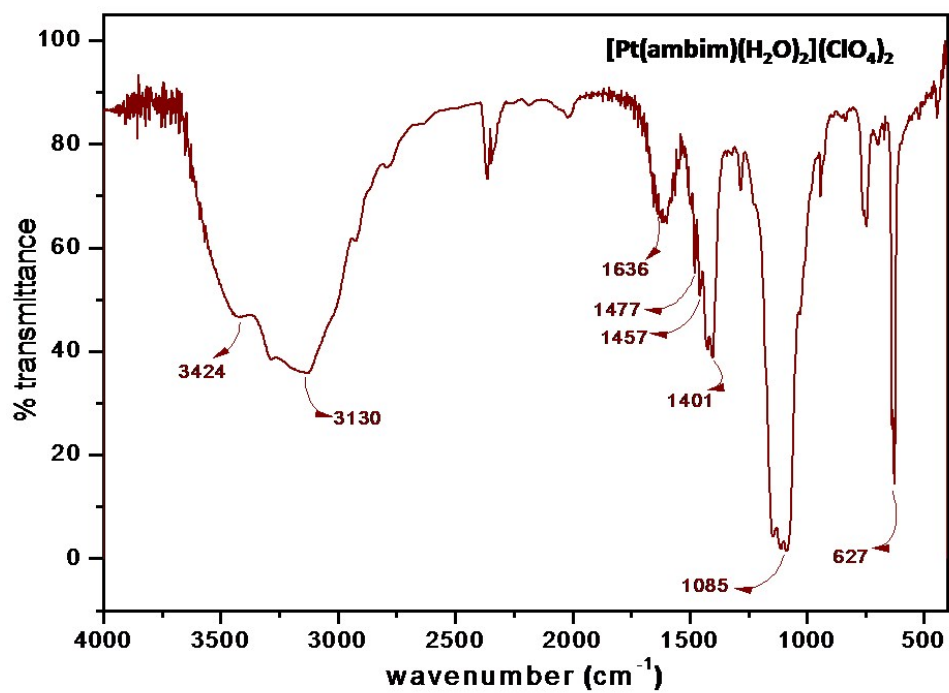

ESI Fig. S4 IR spectra of complex 2

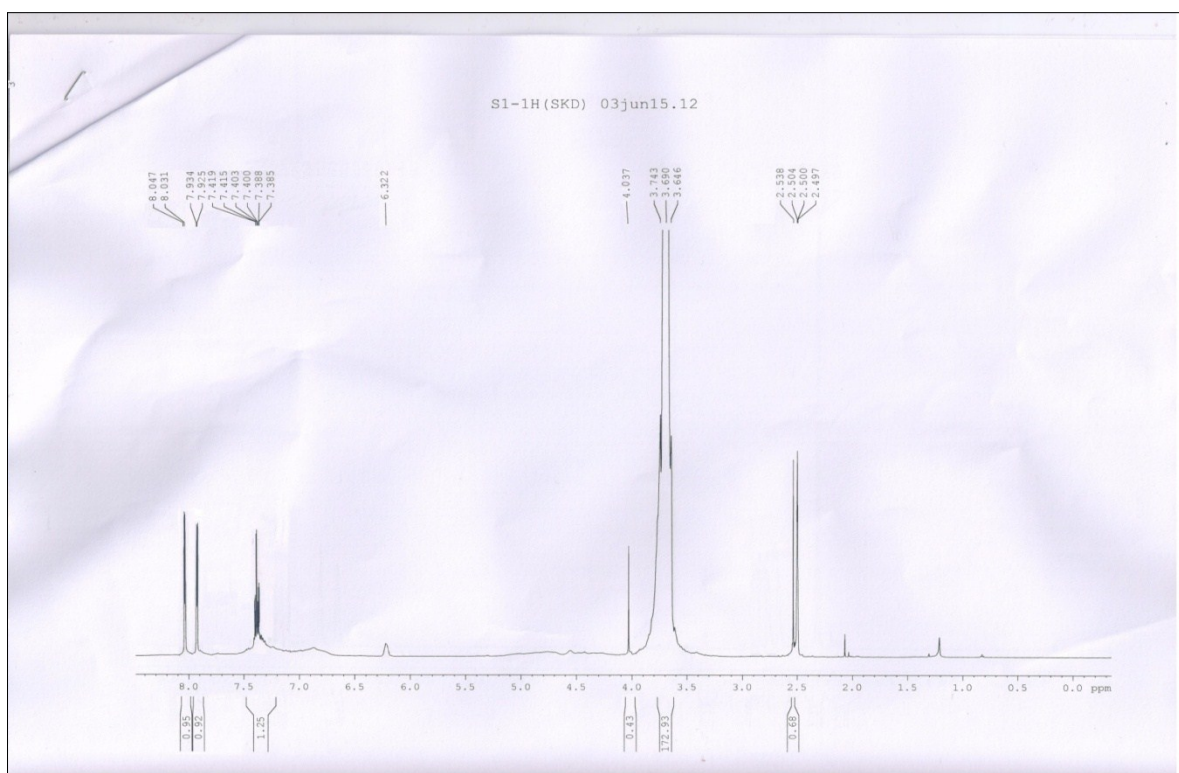

ESI Fig. S5  $^1\text{H}$  NMR spectra of complex 2 in  $\text{DMSO-}d_6$  as solvent

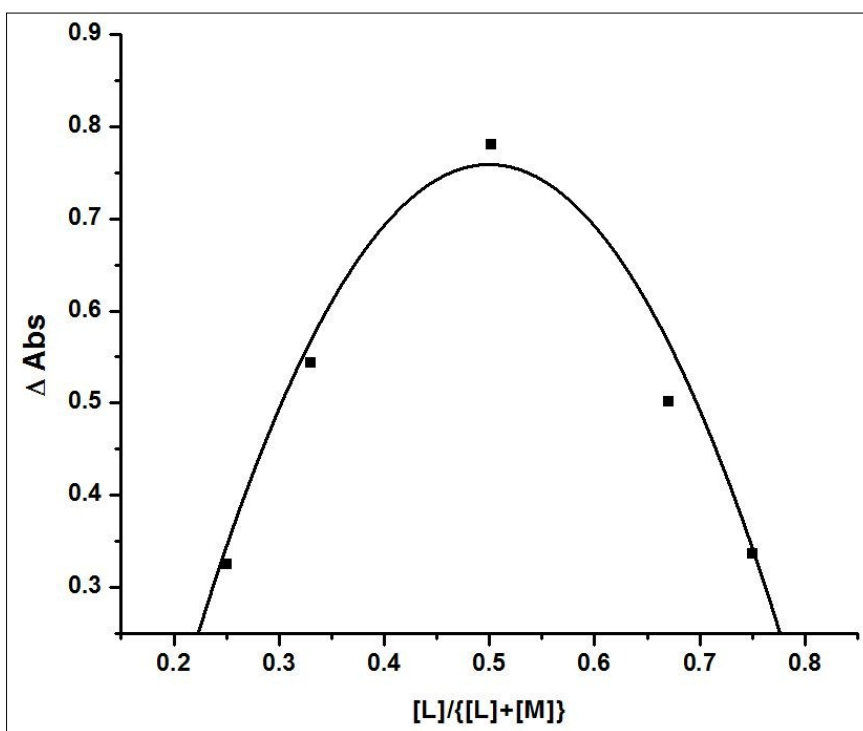

ESI Fig. S6 Job's plot for the formation of complex 3

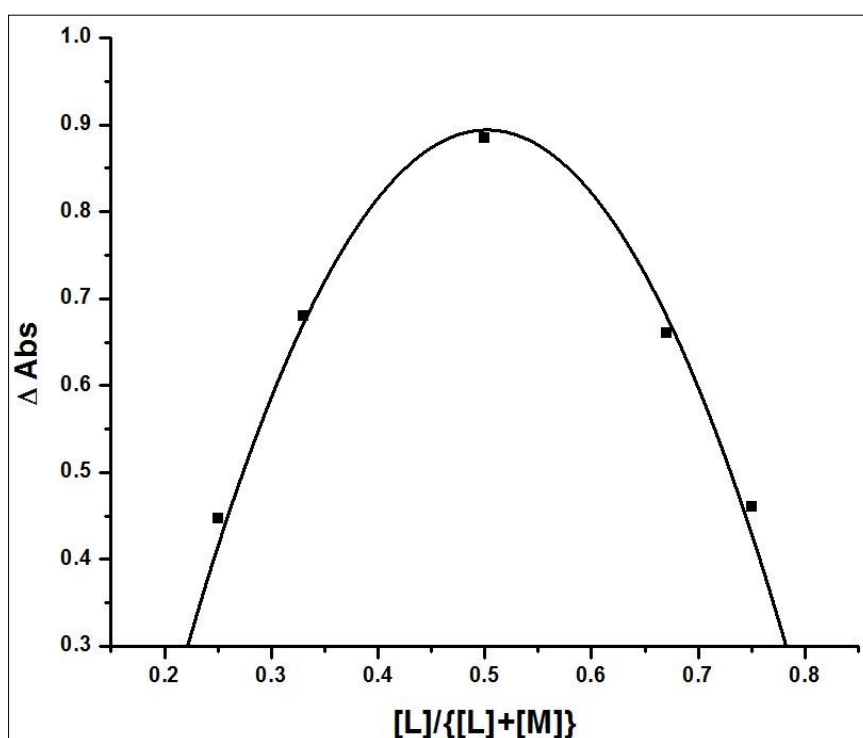

ESI Fig. S7 Job's plot for the formation of complex 4

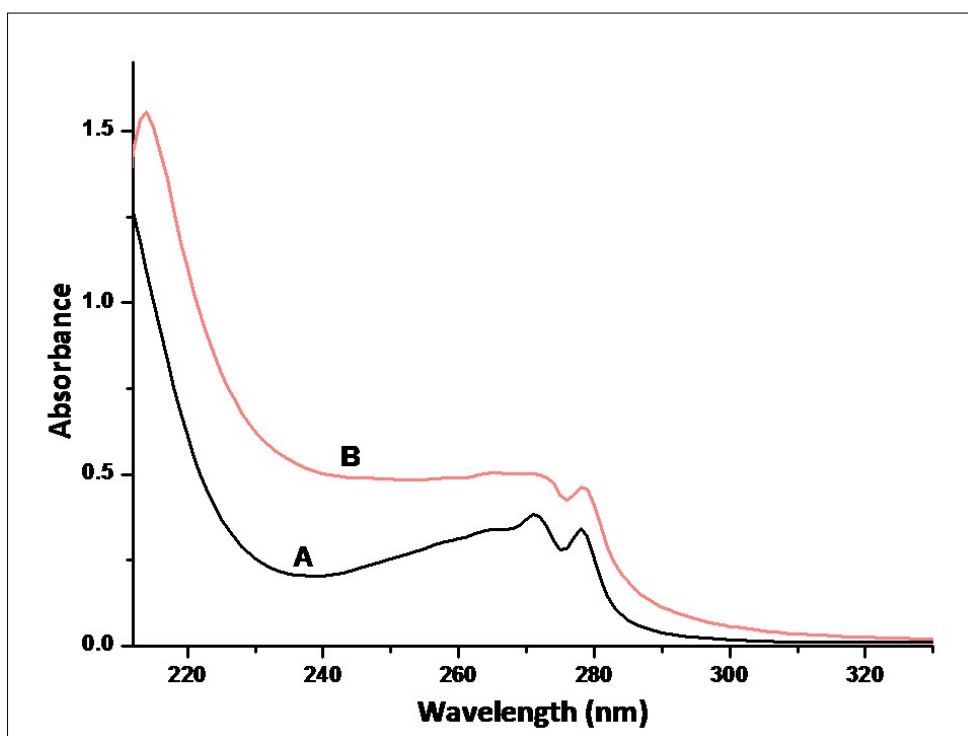

ESI Fig. S8 Spectral difference between the reactant and product - A:  $[\text{Pt}(\text{ambim})(\text{H}_2\text{O})_2]^{2+} = 1.50 \times 10^{-4} \text{ mol.dm}^{-3}$ , B:  $[\text{Pt}(\text{ambim})(\text{H}_2\text{O})_2]^{2+} = 1.50 \times 10^{-4} \text{ mol.dm}^{-3}$ ,  $[\text{DL-penicillamine}] = 1.50 \times 10^{-3} \text{ mol.dm}^{-3}$ , pH = 4.0

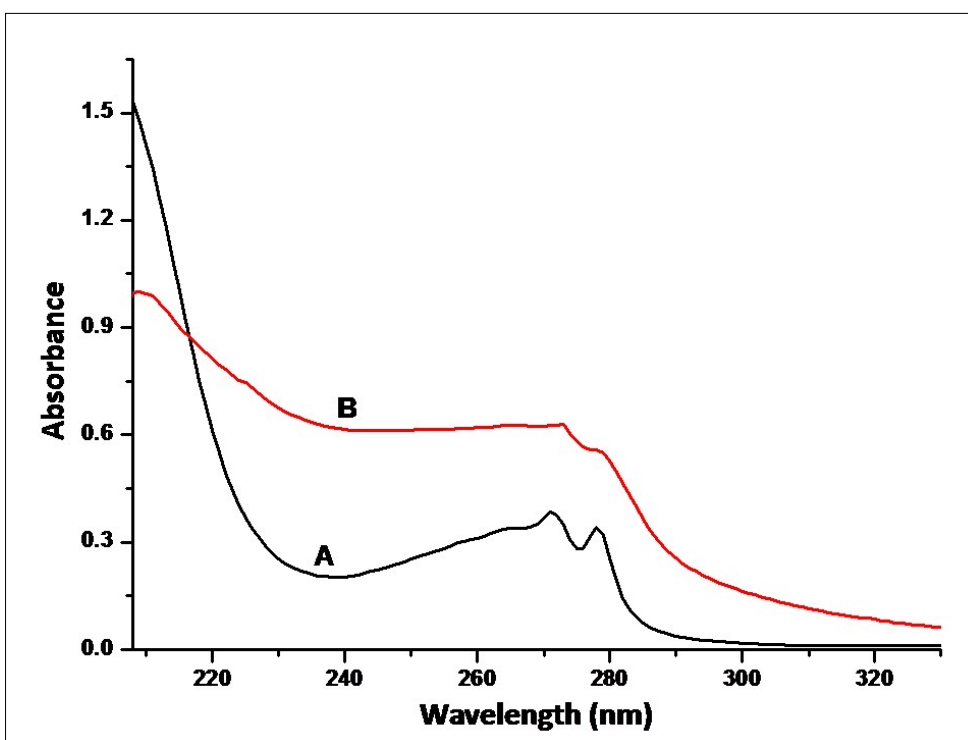

ESI Fig. S9 Spectral difference between the reactant and product - A:  $[\text{Pt}(\text{ambim})(\text{H}_2\text{O})_2]^{2+} = 1.50 \times 10^{-4} \text{ mol.dm}^{-3}$ , B:  $[\text{Pt}(\text{ambim})(\text{H}_2\text{O})_2]^{2+} = 1.50 \times 10^{-4} \text{ mol.dm}^{-3}$ ,  $[\text{Glutathione}] = 1.50 \times 10^{-3} \text{ mol.dm}^{-3}$ , pH = 4.0

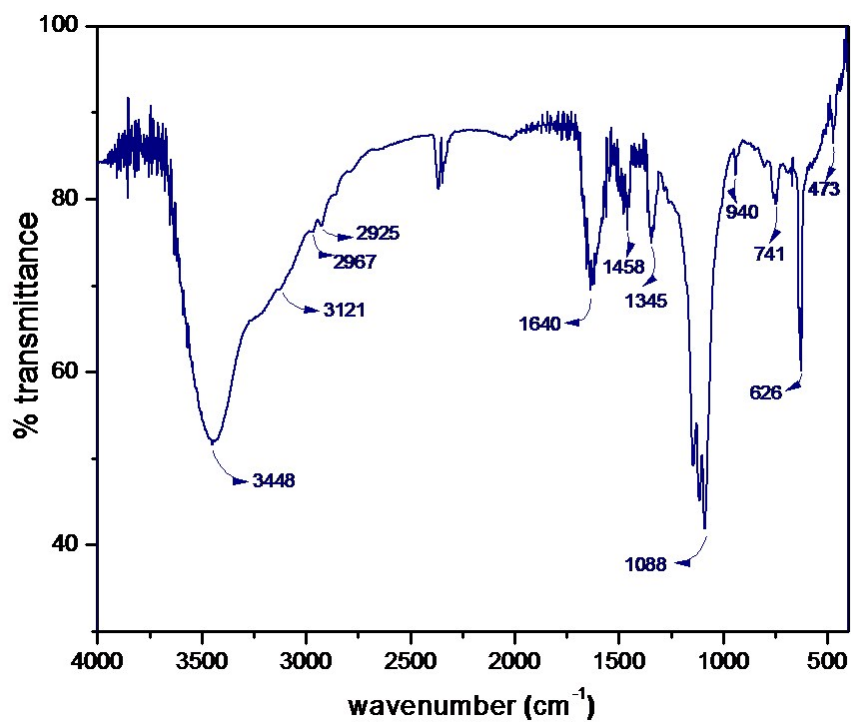

ESI Fig. S10 IR spectra of complex 3

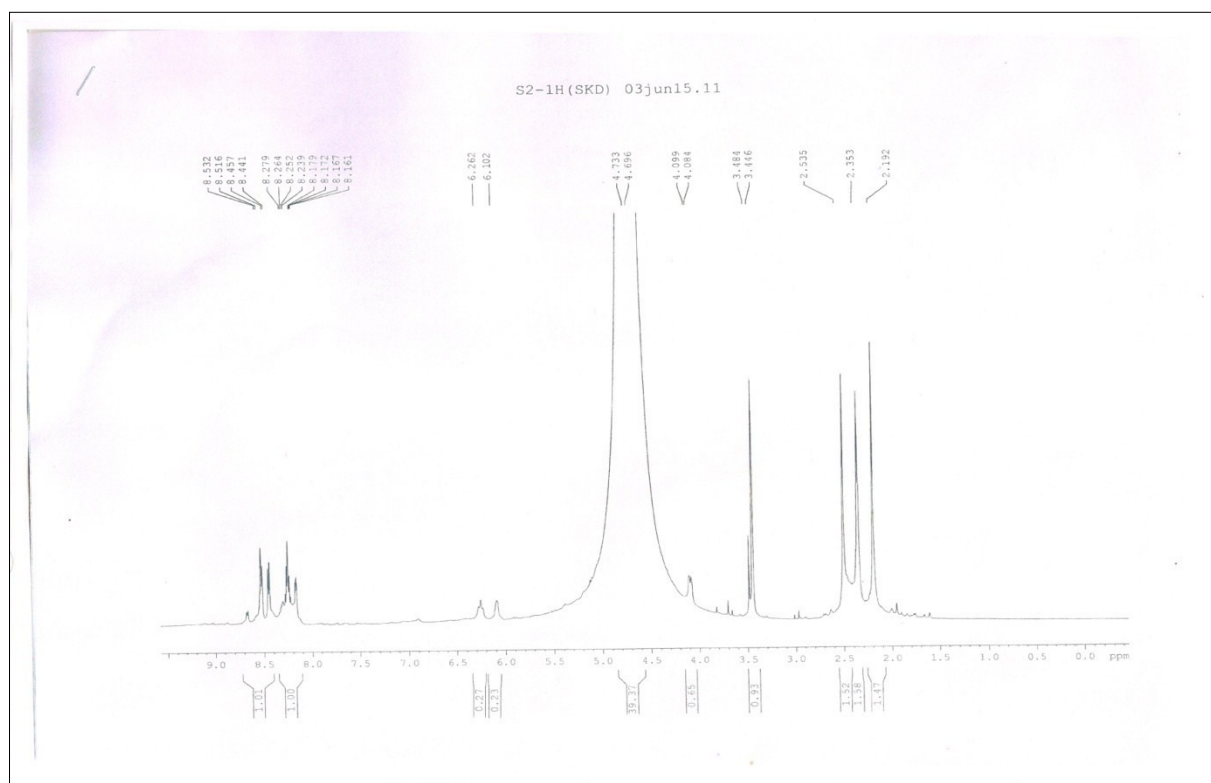

ESI Fig. S11 <sup>1</sup>H NMR spectra of complex 3 in DMSO-D<sub>6</sub> as solvent

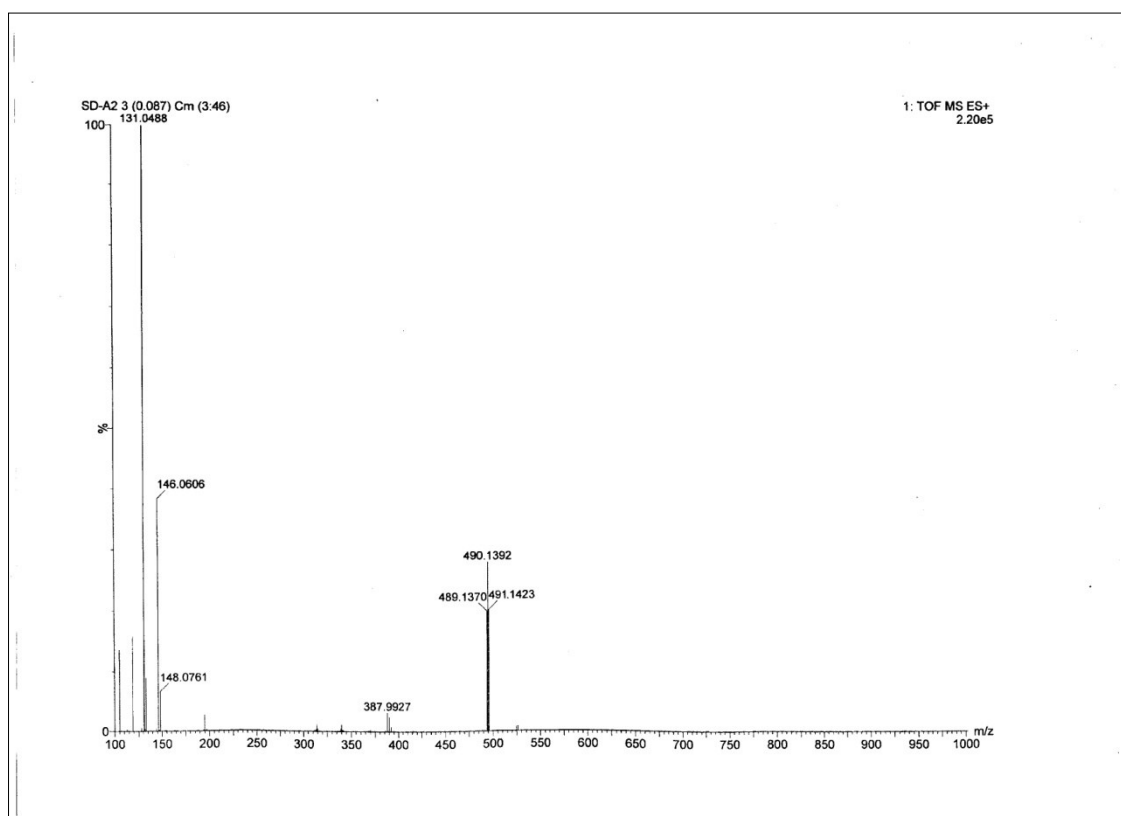

ESI Fig. S12 ESI Mass spectra of complex 3 in water

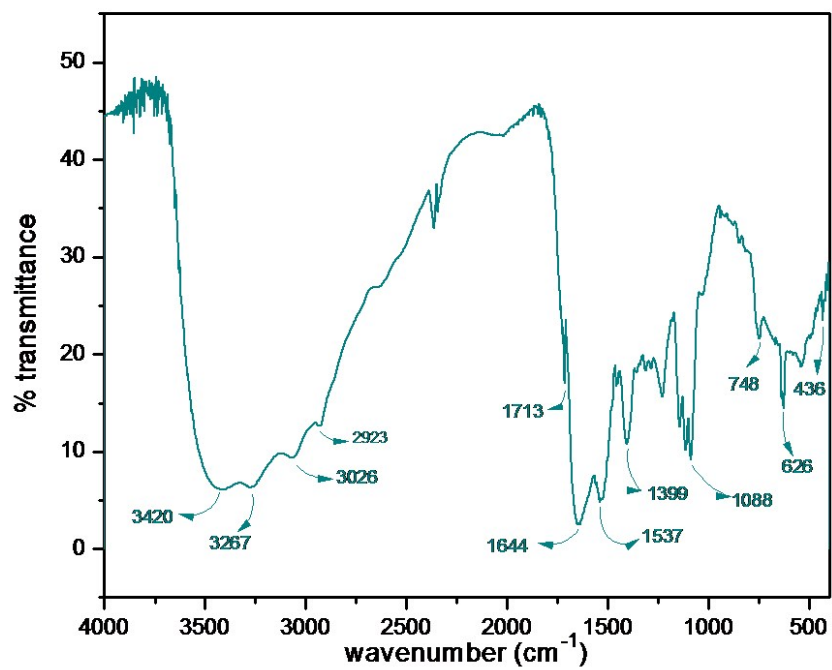

ESI Fig. S13 IR spectra of complex 4



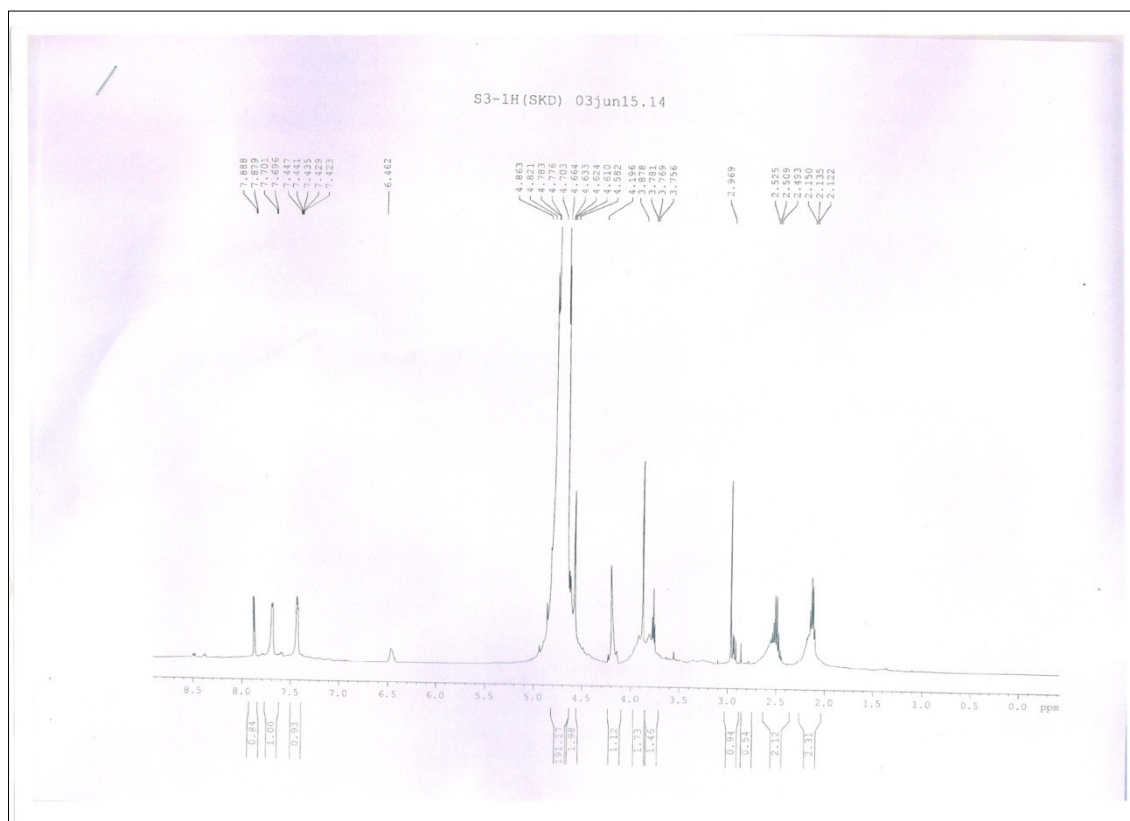

ESI Fig. S14  $^1\text{H}$  NMR spectra of complex **4** in  $\text{DMSO-D}_6$  as solvent

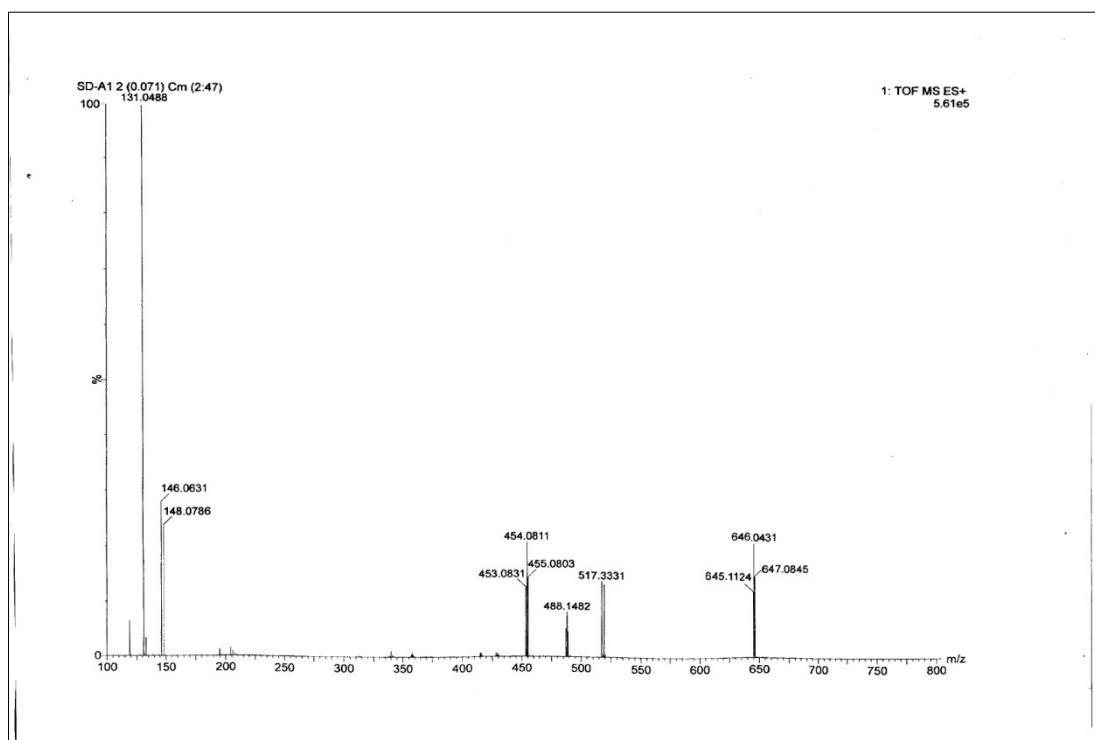

ESI Fig. S15 ESI Mass spectra of complex **4** in water

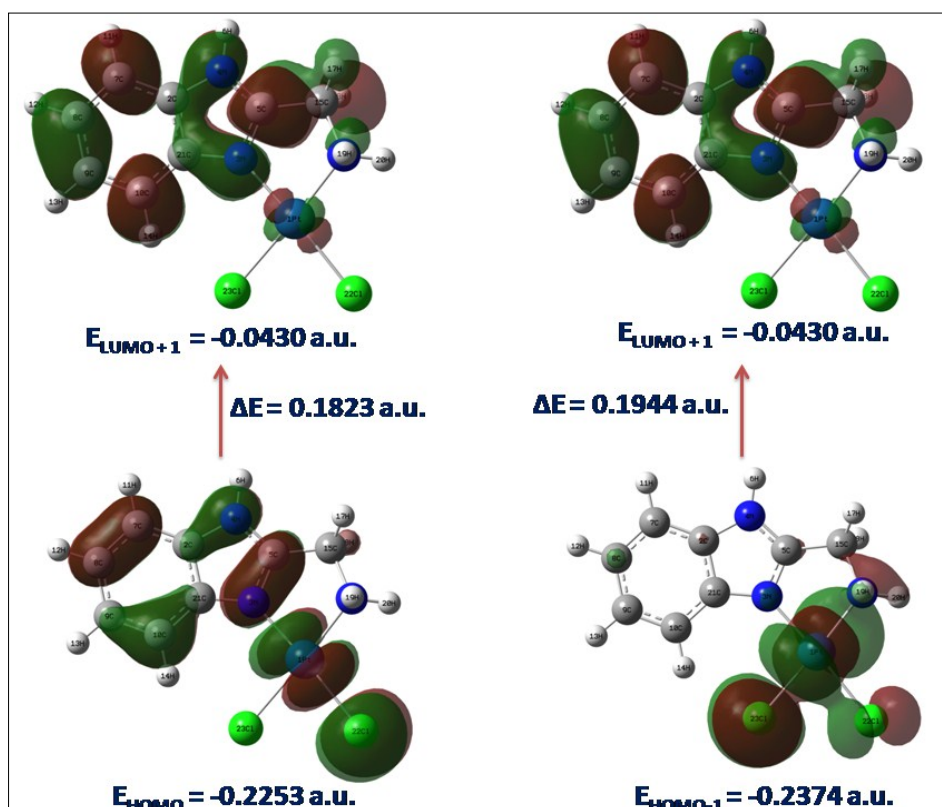

ESI Fig. S16 Major contribution of molecular orbitals involved in electronic transitions in complex 1

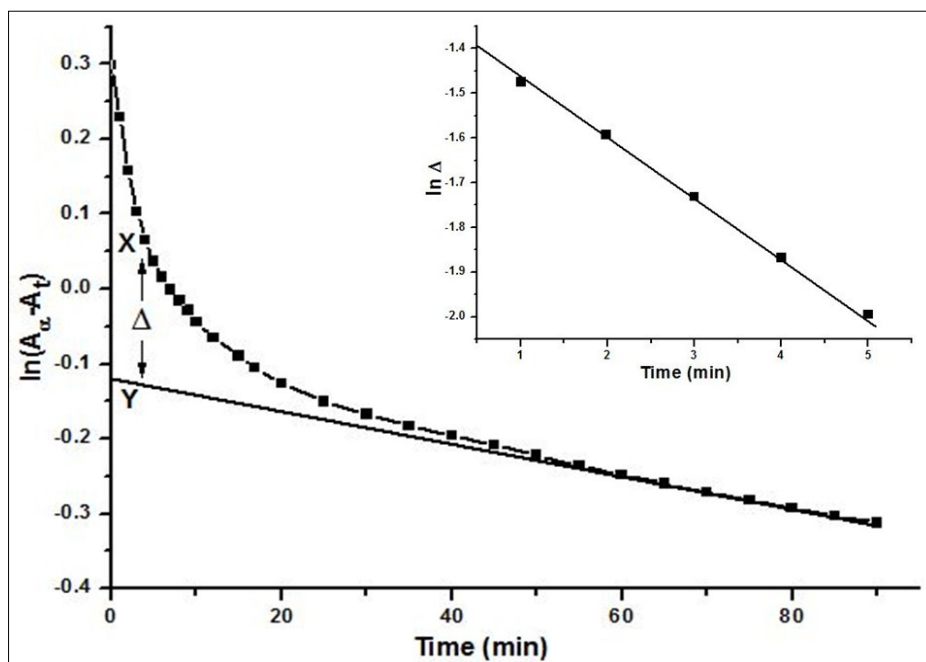

ESI Fig. S17 A typical plot of  $\ln(A_\alpha - A_t)$  versus time (min):  $[\text{complex } 2] = 1.50 \times 10^{-4} \text{ M}$ ;  $[\text{GSH}] = 1.50 \times 10^{-3} \text{ M}$ ; temperature = 25 °C, inset: typical plot of  $\ln \Delta$  vs time (min)

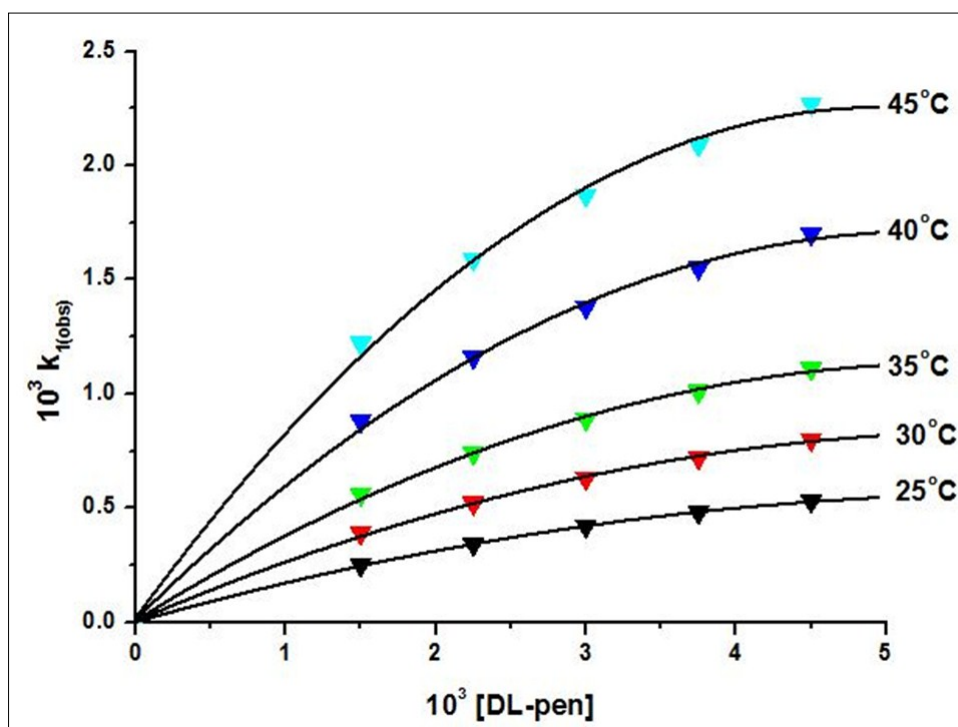

ESI Fig. S18 Plot of  $10^3 k_{1(\text{obs})}$  versus  $10^3 [\text{DL-pen}]$  from temperature 25 to 45 °C

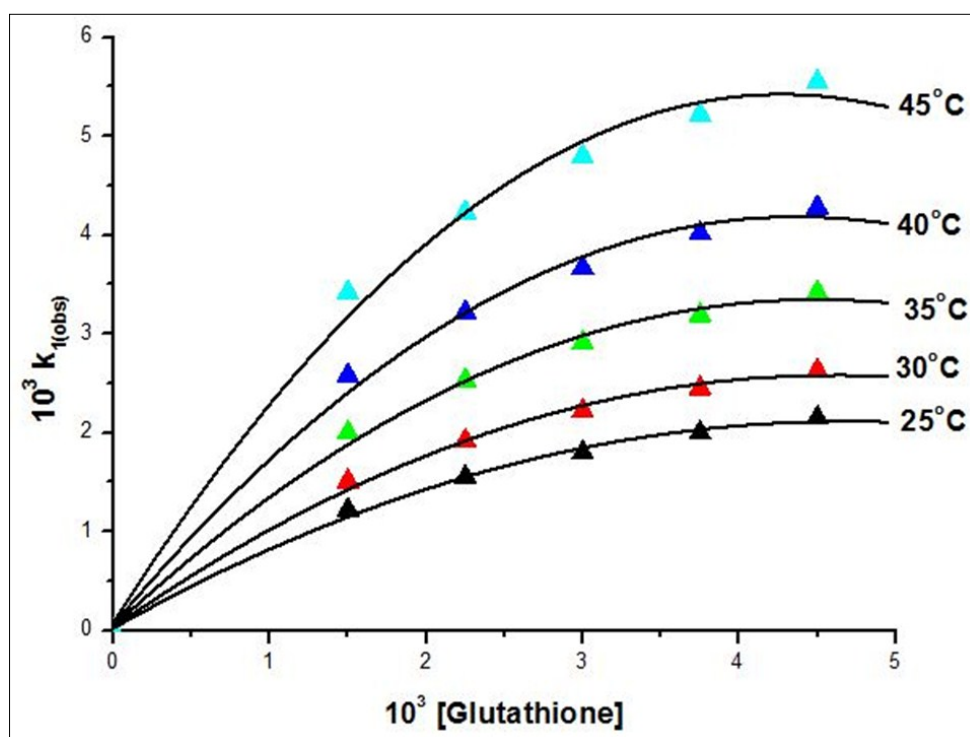

ESI Fig. S19 Plot of  $10^3 k_{1(\text{obs})}$  versus  $10^3 [\text{GSH}]$  from temperature 25 to 45 °C

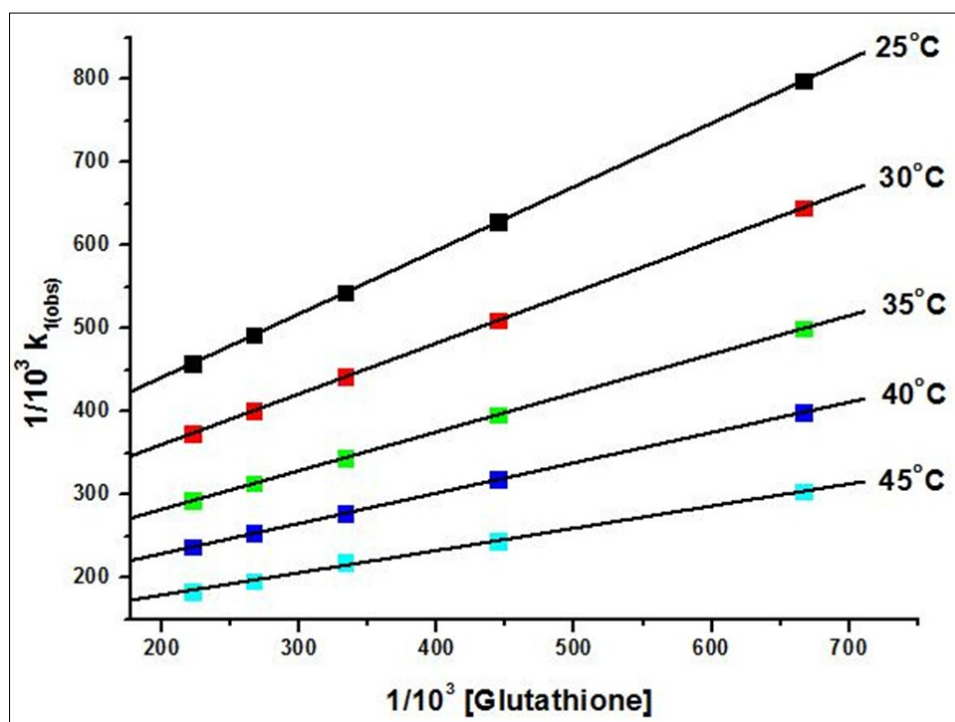

ESI Fig. S20 Plot of  $1/10^3 \times k_{1(\text{obs})}$  versus  $1/10^3[\text{GSH}]$  at different temperatures

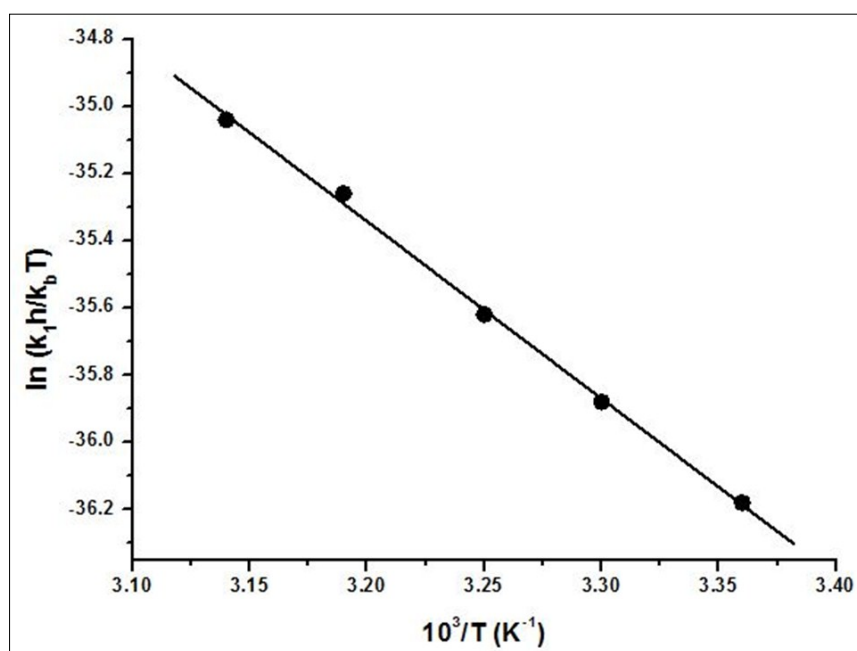

ESI Fig. S21 Eyring plot ( $\ln k_1 h/k_B T$  vs.  $10^3/T$ ) for the reaction of complex **2** with DL-pen

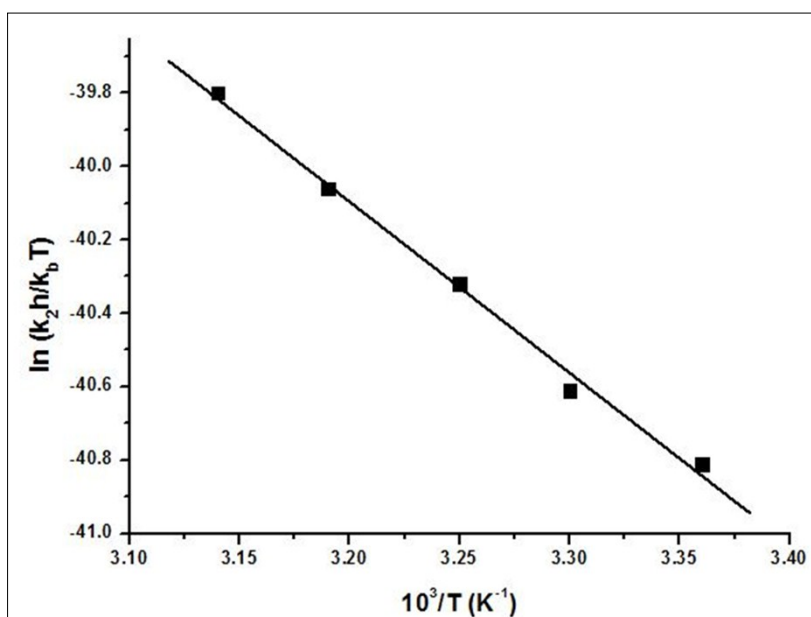

ESI Fig. S22 Eyring plot ( $\ln k_2h/k_bT$  vs.  $10^3/T$ ) for the reaction of complex **2** with DL-pen

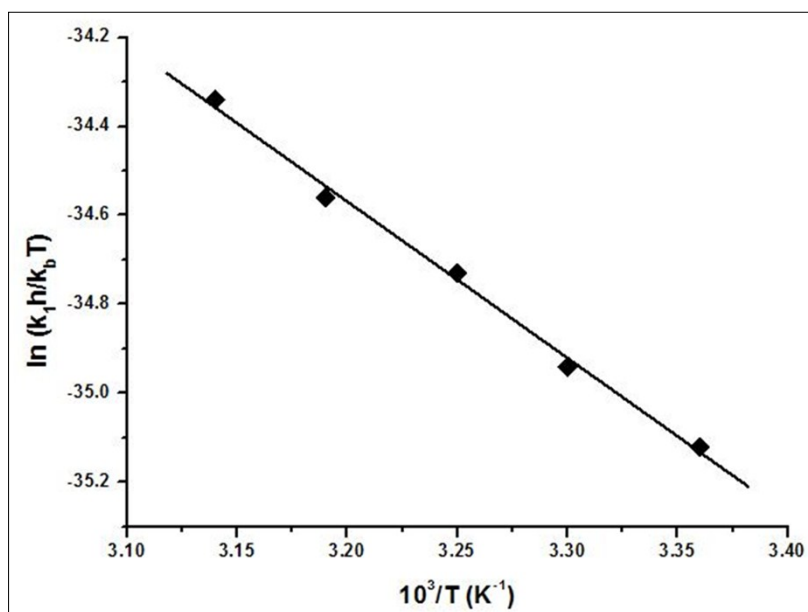

ESI Fig. S23 Eyring plot ( $\ln k_1h/k_bT$  vs.  $10^3/T$ ) for the reaction of complex **2** with GSH

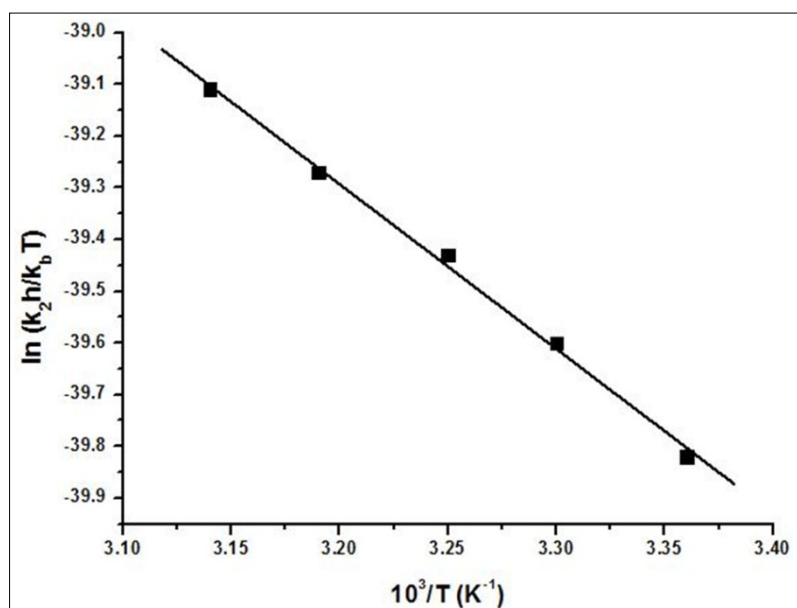

ESI Fig. S24 Eyring plot ( $\ln k_2 h/k_b T$  vs.  $10^3/T$ ) for the reaction of complex 2 with GSH

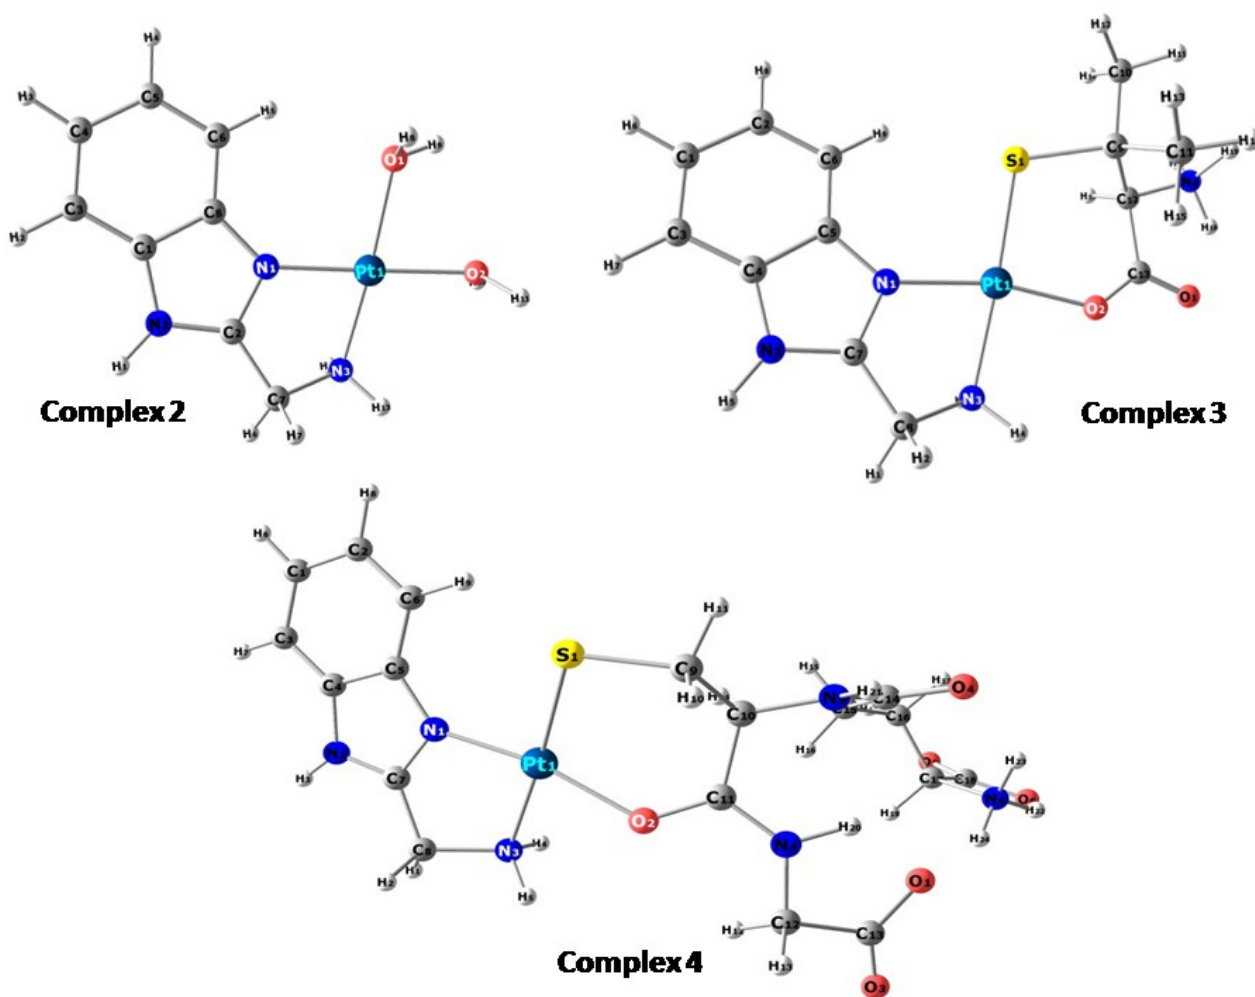

ESI Fig. S25 Optimised structures of complex 2, 3 and 4

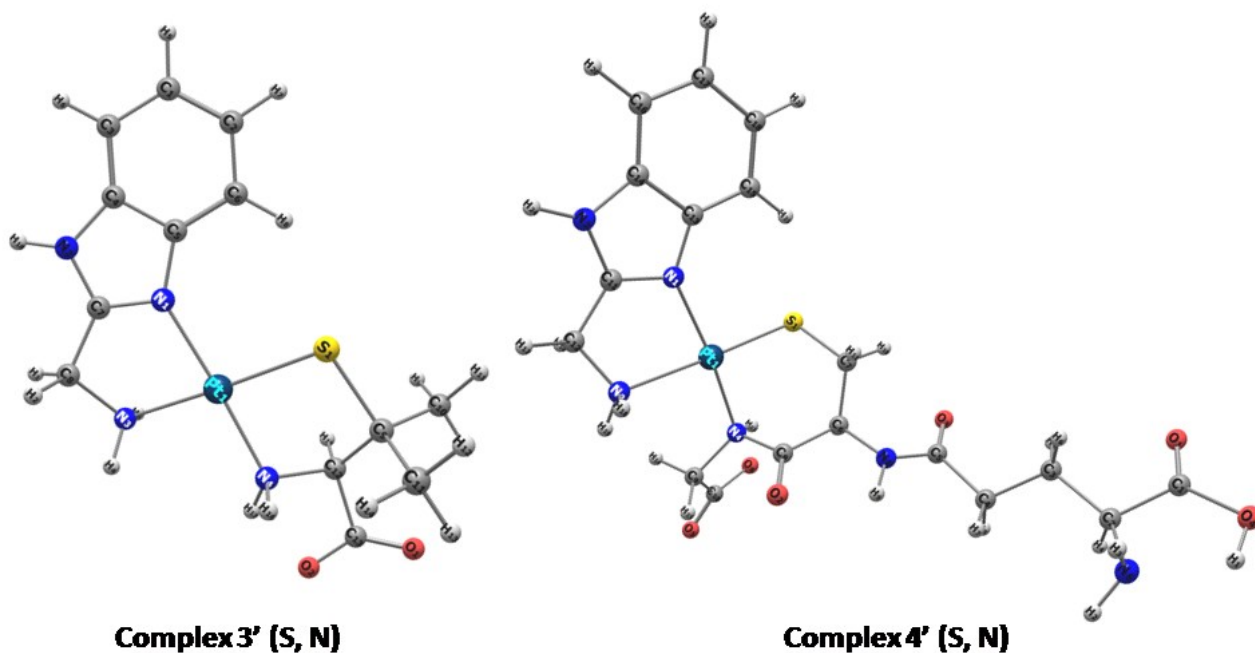

ESI Fig. S26 Optimised structures of probable complex 3'(S, N) and probable complex 4'(S, N)

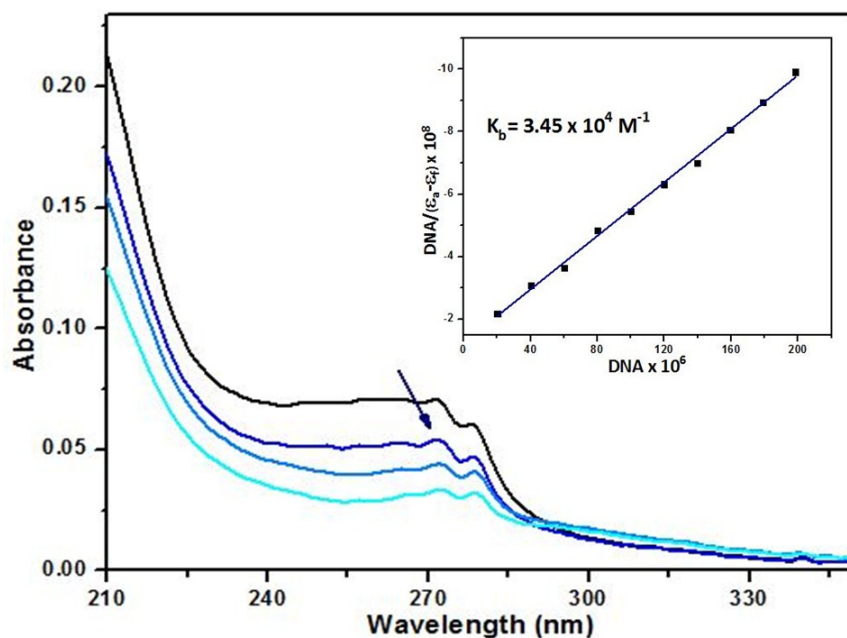

ESI Fig. S27 UV spectra of solutions containing complex 3 (20 μM) upon addition of CT-DNA (0–200 μM) in Tris-HCl buffer. The arrow shows the changes in absorbance on increasing DNA concentration. Inset: Plots of  $[DNA]/[\epsilon_a - \epsilon_f]$  vs.  $[DNA]$  for the titration of the complex 3 with DNA

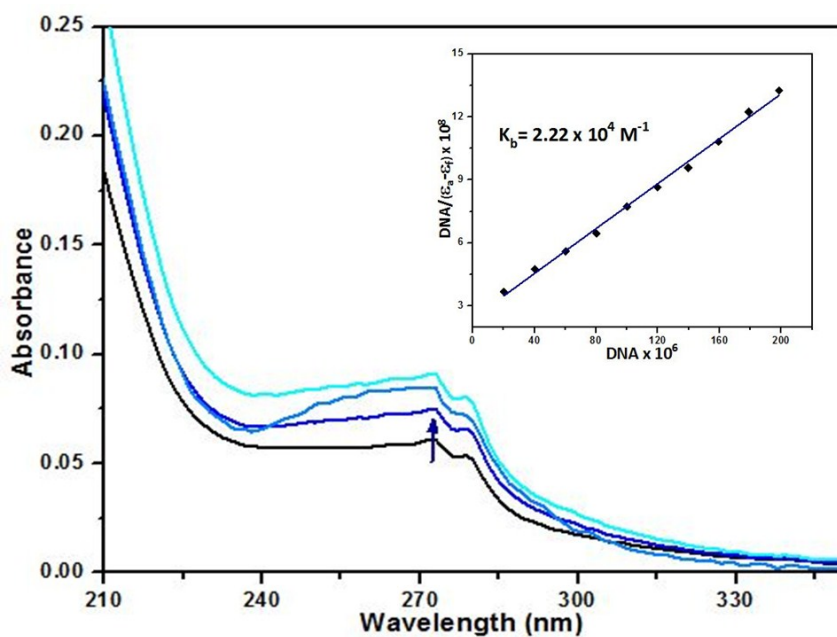

**ESI Fig. S28** UV spectra of solutions containing complex **4** (20  $\mu\text{M}$ ) upon addition of CT-DNA (0–200  $\mu\text{M}$ ) in Tris-HCl buffer. The arrow shows the changes in absorbance on increasing DNA concentration. Inset: Plots of  $[\text{DNA}]/[\epsilon_a - \epsilon_f]$  vs.  $[\text{DNA}]$  for the titration of the complex **4** with DNA

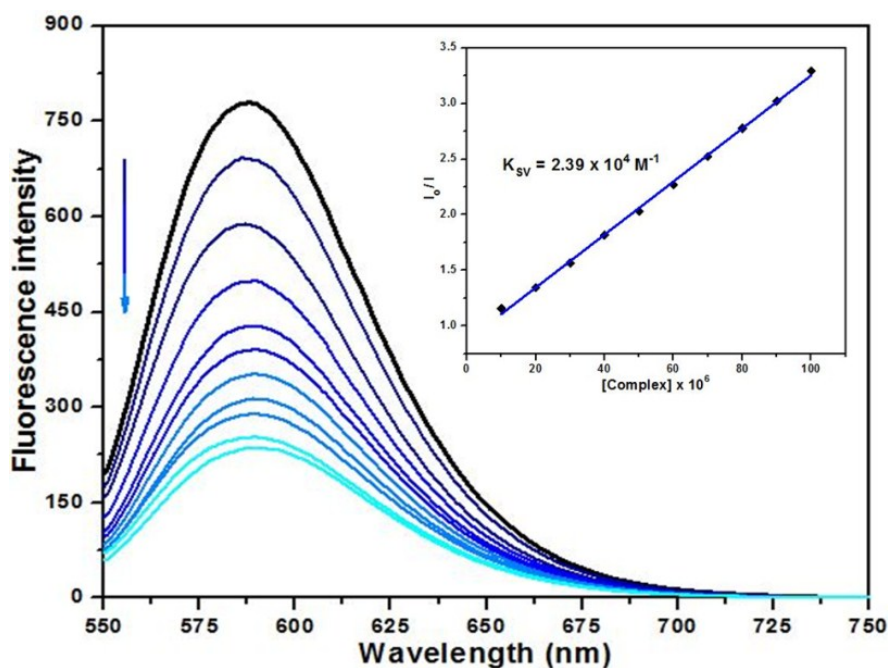

**ESI Fig. S29** Emission spectra of EtBr-bound DNA solutions in the absence and presence of increasing concentrations of **3** (10–100  $\mu\text{M}$ ) in Tris-HCl.  $[\text{EtBr}] = 20.0 \mu\text{M}$ ,  $[\text{DNA}] = 20.0 \mu\text{M}$ . The arrow shows the change in intensity upon increasing amounts of the complex. Inset: Stern-Volmer plot of the fluorescence data.



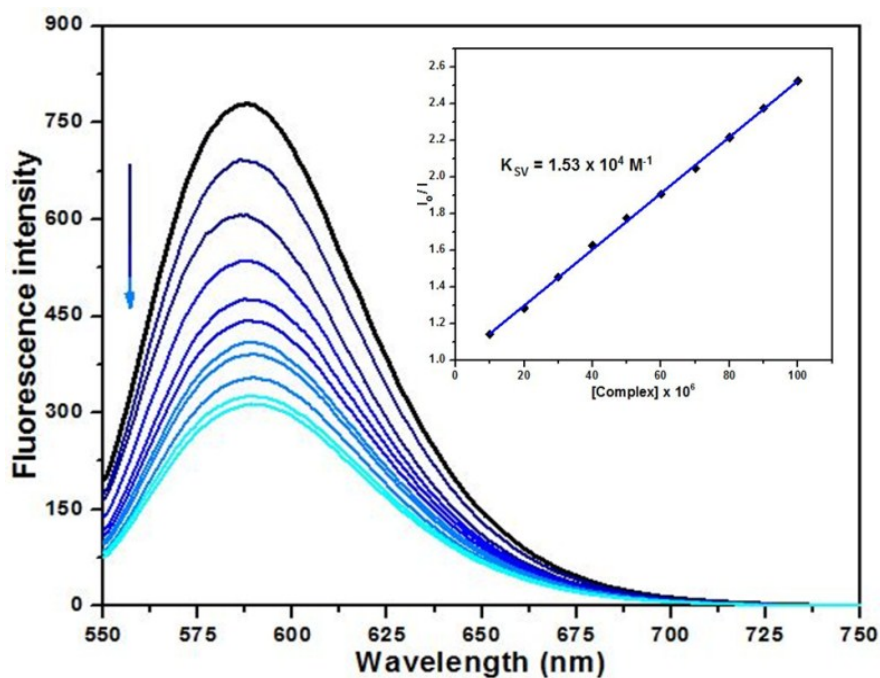

**ESI Fig. S30** Emission spectra of EtBr-bound DNA solutions in the absence and presence of increasing concentrations of **4** (10–100  $\mu\text{M}$ ) in Tris-HCl. [EtBr]= 20.0  $\mu\text{M}$ , [DNA] = 20.0  $\mu\text{M}$ . The arrow show the change in intensity upon increasing amounts of the complex. Inset: Stern–Volmer plot of the fluorescence data.

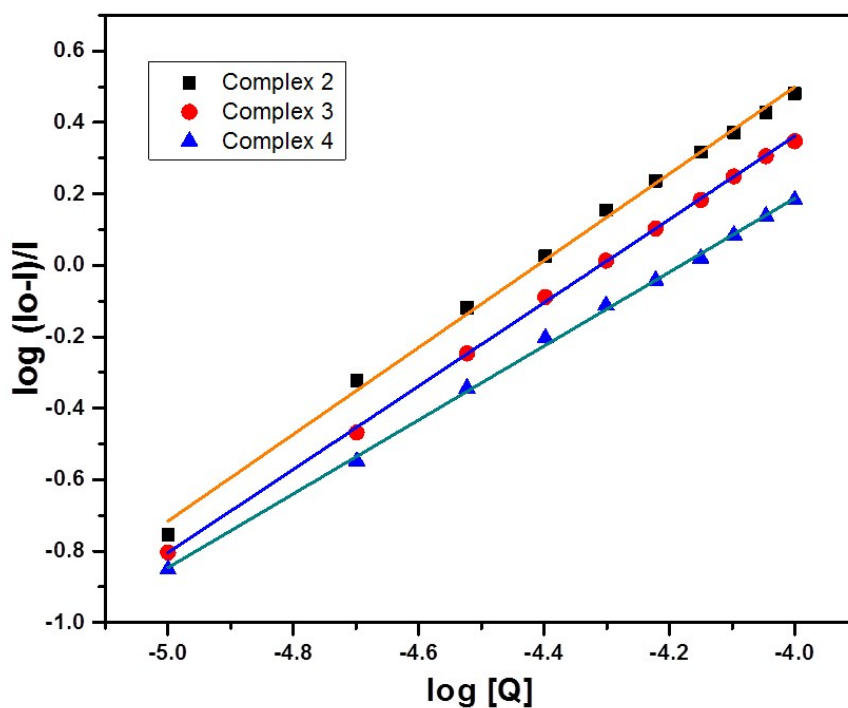

**ESI Fig. S31** Scatchard plots for complexes 2-4

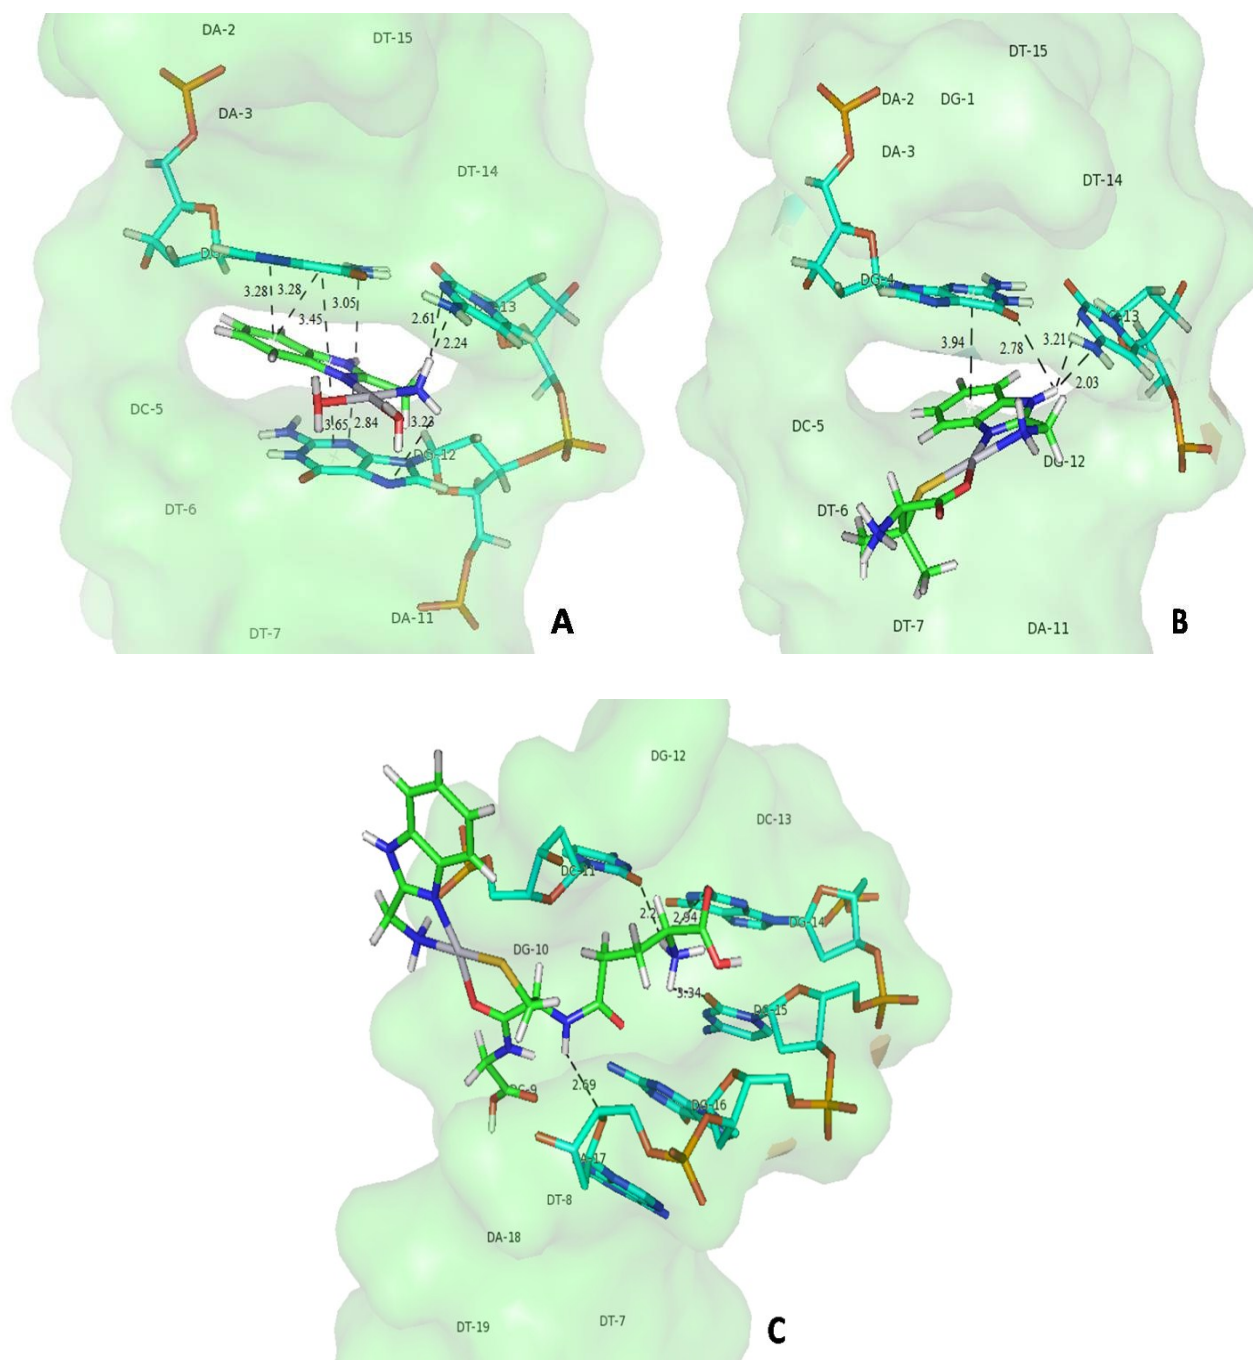

**ESI Fig. S32** Magnified view of docked model showing the interaction of DNA bases with **(A)** complex 2, **(B)** complex 3 and **(C)** complex 4

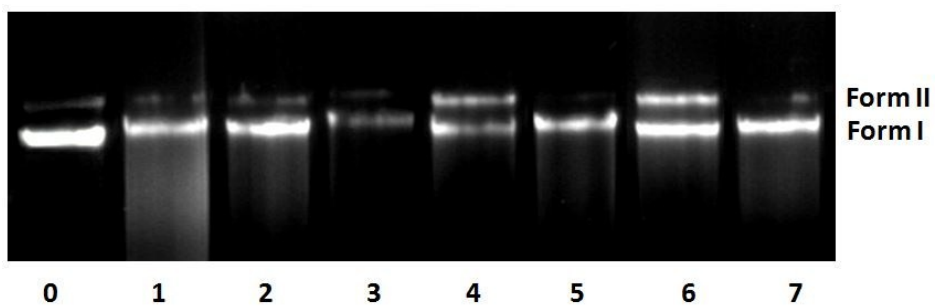

ESI Fig. S33 Gel electrophoresis

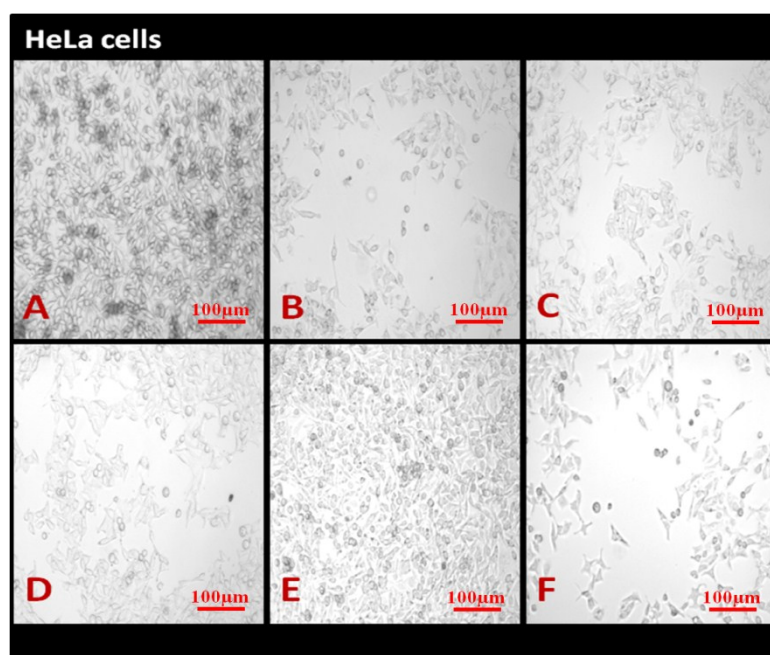

ESI Fig. S34 Microscopic images (A) untreated HeLa cells, (B) treated with 10µM of complex 2, (C) complex 3, (D) complex 4, (E) ambim and (F) cisplatin.

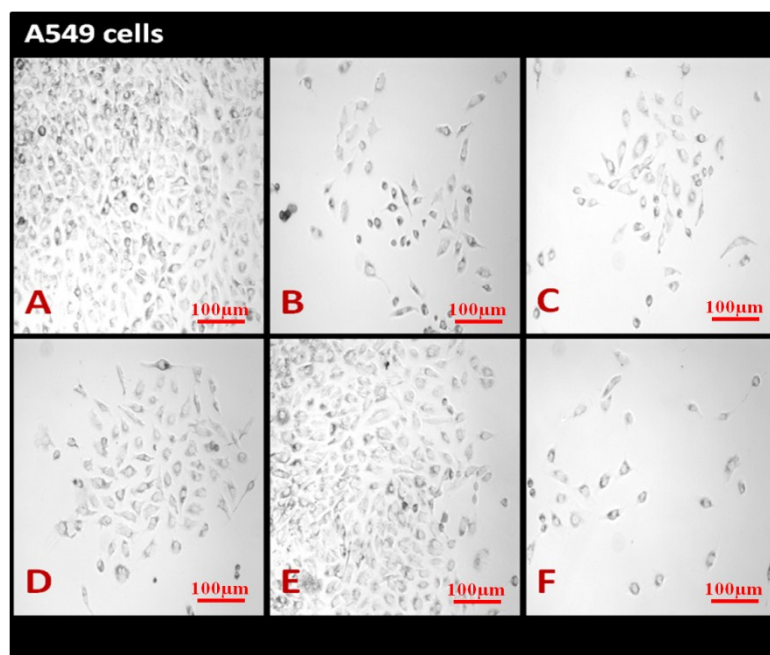

**ESI Fig. S35** Microscopic images (A) untreated A549 cells, (B) treated with 10μM of complex 2, (C) complex 3, (D) complex 4, (E) ambim and (F) cisplatin.

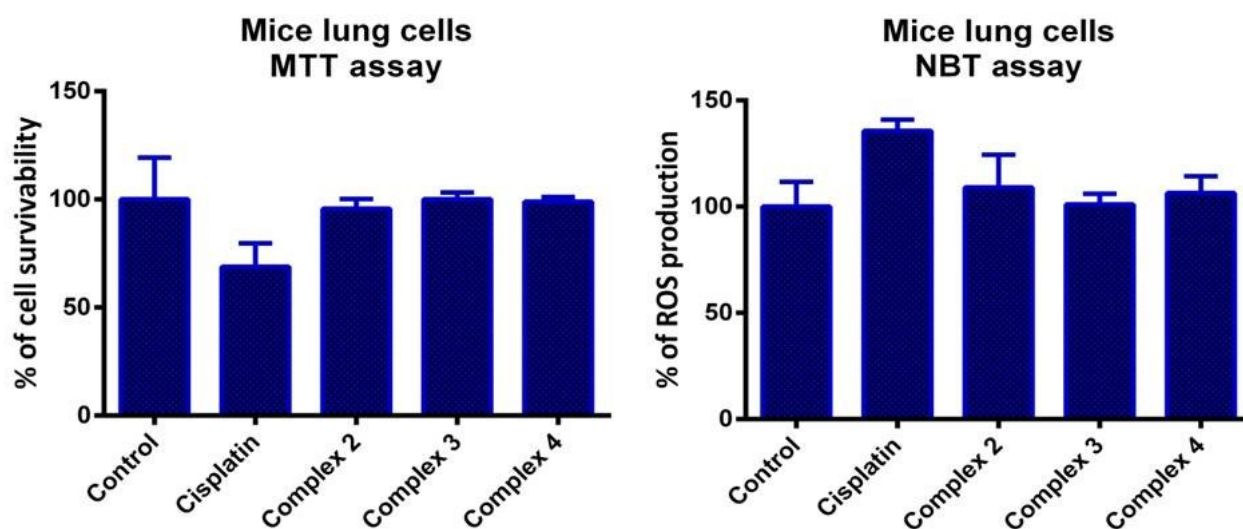

**ESI Fig. S36** Percentage of cell survivability and ROS production in mice lung cells after 4h incubation with 50 μM of cisplatin and complexes 2-4.

**ESI Table S1**  $10^3 \times k_{1(\text{obs})}$  ( $\text{s}^{-1}$ ) values at different [DL-pen] and [GSH] at different temperatures. [Complex 2] =  $2.54 \times 10^{-4}$  M, pH = 4.0, ionic strength = 0.1 M  $\text{NaClO}_4$

| $10^3 \times [\text{L}]$<br>mol.dm <sup>-3</sup> | Temp (°C)      |                |                |                |                |                |                |                |                |             |
|--------------------------------------------------|----------------|----------------|----------------|----------------|----------------|----------------|----------------|----------------|----------------|-------------|
|                                                  | DL-pen         |                |                |                |                | GSH            |                |                |                |             |
|                                                  | 25 °C          | 30 °C          | 35 °C          | 40 °C          | 45 °C          | 25 °C          | 30 °C          | 35 °C          | 40 °C          | 45 °C       |
| 1.50                                             | 0.25 ±<br>0.06 | 0.39 ±<br>0.07 | 0.56 ±<br>0.04 | 0.88 ±<br>0.02 | 1.22 ±<br>0.04 | 1.22 ±<br>0.06 | 1.51 ±<br>0.08 | 2.00 ±<br>0.07 | 2.58 ±<br>0.04 | 3.42 ± 0.13 |
| 2.25                                             | 0.34 ± .10     | 0.52 ±<br>0.06 | 0.74 ±<br>0.13 | 1.16 ±<br>0.08 | 1.59 ±<br>0.05 | 1.55 ±<br>0.04 | 1.92 ±<br>0.05 | 2.53 ±<br>0.08 | 3.22 ±<br>0.14 | 4.23 ± 0.06 |
| 3.00                                             | 0.42 ±<br>0.12 | 0.63 ±<br>0.05 | 0.89 ±<br>0.09 | 1.38 ±<br>0.06 | 1.87 ±<br>0.12 | 1.80 ±<br>0.10 | 2.22 ±<br>0.12 | 2.91 ±<br>0.11 | 3.67 ±<br>0.07 | 4.80 ± 0.09 |
| 3.75                                             | 0.48 ±<br>0.09 | 0.72 ±<br>0.14 | 1.01 ±<br>0.11 | 1.55 ±<br>0.09 | 2.09 ±<br>0.03 | 2.00 ±<br>0.11 | 2.45 ±<br>0.07 | 3.19 ±<br>0.04 | 4.02 ±<br>0.06 | 5.22 ± 0.10 |
| 4.50                                             | 0.53 ±<br>0.02 | 0.80 ±<br>0.03 | 1.11 ±<br>0.04 | 1.70 ±<br>0.04 | 2.27 ±<br>0.06 | 2.15 ±<br>0.02 | 2.63 ±<br>0.05 | 3.42 ±<br>0.09 | 4.28 ±<br>0.03 | 5.55 ± 0.15 |

**ESI Table S2**  $10^5 \times k_{2(\text{obs})}$  ( $\text{s}^{-1}$ ) values at different [DL-pen] and [GSH] at different temperatures; [Complex 2] =  $1.50 \times 10^{-4}$  mol.dm<sup>-3</sup>, pH = 4.0, ionic strength = 0.1 mol.dm<sup>-3</sup>  $\text{NaClO}_4$

| $10^5 \times [\text{L}]$<br>mol.dm <sup>-3</sup> | Temp( °C)      |                |                |                |                |                |                |                |                |                |
|--------------------------------------------------|----------------|----------------|----------------|----------------|----------------|----------------|----------------|----------------|----------------|----------------|
|                                                  | DL-pen         |                |                |                |                | GSH            |                |                |                |                |
|                                                  | 25 °C          | 30 °C          | 35 °C          | 40 °C          | 45 °C          | 25 °C          | 30 °C          | 35 °C          | 40 °C          | 45 °C          |
| 1.50                                             | 1.03 ±<br>0.06 | 1.56 ±<br>0.10 | 2.00 ±<br>0.05 | 2.49 ±<br>0.13 | 3.41 ±<br>0.04 | 3.18 ±<br>0.08 | 3.92 ±<br>0.05 | 4.95 ±<br>0.12 | 5.56 ±<br>0.15 | 6.94 ±<br>0.10 |
| 2.25                                             | 1.18 ±<br>0.14 | 1.42 ±<br>0.04 | 1.89 ±<br>0.09 | 2.68 ±<br>0.03 | 3.62 ±<br>0.05 | 3.22 ±<br>0.10 | 4.07 ±<br>0.09 | 4.87 ±<br>0.06 | 5.71 ±<br>0.08 | 6.85 ±<br>0.05 |
| 3.00                                             | 1.25 ±<br>0.03 | 1.37 ±<br>0.07 | 1.92 ±<br>0.02 | 2.56 ±<br>0.14 | 3.38 ±<br>0.08 | 3.03 ±<br>0.05 | 4.15 ±<br>0.06 | 4.71 ±<br>0.08 | 5.90 ±<br>0.07 | 6.69 ±<br>0.03 |
| 3.75                                             | 1.11 ±<br>0.11 | 1.50 ±<br>0.03 | 2.11 ±<br>0.08 | 2.73 ±<br>0.05 | 3.29 ±<br>0.06 | 3.09 ±<br>0.06 | 3.97 ±<br>0.11 | 4.69 ±<br>0.07 | 5.83 ±<br>0.11 | 6.97 ±<br>0.13 |
| 4.50                                             | 1.28 ±<br>0.04 | 1.45 ±<br>0.05 | 1.98 ±<br>0.03 | 2.59 ±<br>0.08 | 3.50 ±<br>0.10 | 3.23 ±<br>0.04 | 3.89 ±<br>0.09 | 4.88 ±<br>0.10 | 5.80 ±<br>0.08 | 6.90 ±<br>0.06 |

ESI Table S3 Activation parameters for analogous systems

| Systems                                                                                 | $\Delta H_1^\ddagger$ (kJ mol <sup>-1</sup> ) | $\Delta S_1^\ddagger$ (JK mol <sup>-1</sup> ) | $\Delta H_2^\ddagger$ (kJ mol <sup>-1</sup> ) | $\Delta S_2^\ddagger$ (JK mol <sup>-1</sup> ) | Ref.      |
|-----------------------------------------------------------------------------------------|-----------------------------------------------|-----------------------------------------------|-----------------------------------------------|-----------------------------------------------|-----------|
| [Pt(ambim)(H <sub>2</sub> O) <sub>2</sub> ] <sup>2+</sup> / DL-penicillamine            | 43.79 ±1.31                                   | -149.00 ±1.20                                 | 38.7 ±1.16                                    | -205.12 ±1.78                                 | This work |
| [Pt(ambim)(H <sub>2</sub> O) <sub>2</sub> ] <sup>2+</sup> / Glutathione                 | 31.04 ±1.44                                   | -184.65 ±1.17                                 | 26.46 ±1.19                                   | -239.16 ±1.61                                 |           |
| [Pt(pic)(H <sub>2</sub> O) <sub>2</sub> ] <sup>2+</sup> / L-cysteine                    | 34.91±0.97                                    | -174.68±2.18                                  | 29.11±0.72                                    | -233.74±2.4                                   | 1         |
| [Pt(pic)(H <sub>2</sub> O) <sub>2</sub> ] <sup>2+</sup> / N-acetyl-L- cysteine          | 21.12±0.35                                    | -294.25±1.05                                  | 19.45±0.47                                    | -267.68±1.6                                   |           |
| [Pt(en)(H <sub>2</sub> O) <sub>2</sub> ] <sup>2+</sup> / Thiourea                       | 57.0 ± 3.0                                    | -24.0 ± 1.1                                   | 36.0 ± 2.0                                    | -69.0 ± 6.0                                   | 2         |
| [Pt(terpy)(H <sub>2</sub> O) <sub>2</sub> ] <sup>2+</sup> / Glutathione                 | 23 ± 1                                        | -116 ± 3                                      | ----                                          | ----                                          | 3         |
| <i>cis</i> -[Pt(pic)(H <sub>2</sub> O) <sub>2</sub> ] <sup>2+</sup> /Glutathione        | 52.37±2.10                                    | -112.35±2.98                                  | 37.29±1.84                                    | -130.12±3.16                                  | 4         |
| [ <i>cis</i> -Pt(en)(H <sub>2</sub> O) <sub>2</sub> ] <sup>2+</sup> / thiourea          | 61.90±1.6                                     | -71±6                                         | 26.70±0.8                                     | -186.80±2.7                                   | 5         |
| [ <i>cis</i> -Pt(dach)(H <sub>2</sub> O) <sub>2</sub> ] <sup>2+</sup> /Glutathione      | 32.9±1.3                                      | -187.20±4.2                                   | 30.50±0.1                                     | -223.1±4.3                                    | 6         |
| [ <i>cis</i> -Pt(dach)(H <sub>2</sub> O) <sub>2</sub> ] <sup>2+</sup> /DL-penicillamine | 36.10±4.1                                     | -175±12                                       | 44.4±1.1                                      | -189±3.0                                      | 7         |

ESI Table S4 Charges (a.u.) and electron configurations for the complexes **3**(S, O) and **3'**(S, N)

|                         | Zero point corrected energy (hatee) | Atom | Charge   | Natural Electron Configuration                 |                          | Zero point corrected energy (hatee) | Atom | Charge   | Natural Electron Configuration                 |
|-------------------------|-------------------------------------|------|----------|------------------------------------------------|--------------------------|-------------------------------------|------|----------|------------------------------------------------|
| <b>Complex 3 (S, O)</b> | -1393.51581                         | Pt1  | 0.36019  | [core]6S(0.57)<br>5d(8.75)6p(0.31)<br>6d(0.01) | <b>Complex 3' (S, N)</b> | -1393.08842                         | Pt1  | 0.24480  | [core]6S(0.60)<br>5d(8.84)6p(0.31)<br>6d(0.01) |
|                         |                                     | S1   | -0.09227 | [core]3S(1.72)<br>3p(4.34)3d(0.01)<br>4p(0.01) |                          |                                     | S1   | -0.11505 | [core]3S(1.73)<br>3p(4.36)3d(0.01)<br>4p(0.01) |
|                         |                                     | O2   | -0.63601 | [core]2S(1.65)<br>2p(4.98)3p(0.01)             |                          |                                     | N4   | -0.81353 | [core]2S(1.40)<br>2p(4.40)3p(0.01)             |
|                         |                                     | N4   | -0.81224 | [core]2S(1.39)<br>2p(4.41)3p(0.01)             |                          |                                     | O1   | -0.71065 | [core]2S(1.71)<br>2p(4.98)3d(0.01)             |
|                         |                                     | O1   | -0.65427 | [core]2S(1.71)<br>2p(4.93)3d(0.01)             |                          |                                     | O2   | -0.76542 | [core]2S(1.72)<br>2p(5.03)3d(0.01)             |

**ESI Table S5** Charges (a.u.) and electron configurations for the complexes **4**(S, O) and **4'**(S, N)

| Complex 4 (S, O) | Zero point corrected energy (hatee) | Atom     | Charge                                         | Natural Electron Configuration                 | Complex 4' (S, N) | Zero point corrected energy (hatee) | Atom                                           | Charge  | Natural Electron Configuration                 |
|------------------|-------------------------------------|----------|------------------------------------------------|------------------------------------------------|-------------------|-------------------------------------|------------------------------------------------|---------|------------------------------------------------|
|                  | -1997.64846                         | Pt1      | 0.33887                                        | [core]6S(0.57)<br>5d(8.76)6p(0.32)<br>6d(0.01) |                   | -1997.635519                        | Pt1                                            | 0.30495 | [core]6S(0.58)<br>5d(8.84)6p(0.26)<br>6d(0.02) |
|                  | S1                                  | -0.09714 | [core]3S(1.72)<br>3p(4.34)3d(0.01)<br>4p(0.01) |                                                | S1                | -0.06732                            | [core]3S(1.73)<br>3p(4.31)3d(0.01)<br>4p(0.01) |         |                                                |
|                  | O2                                  | -0.63051 | [core]2S(1.64)<br>2p(4.98)3p(0.01)             |                                                | N4                | -0.71611                            | [core]2S(1.36)<br>2p(4.34)3p(0.01)             |         |                                                |
|                  | N4                                  | -0.59370 | [core]2S(1.26)<br>2p(4.32)3p(0.01)             |                                                | O2                | -0.57169                            | [core]2S(1.69)<br>2p(4.86)3d(0.02)             |         |                                                |

**ESI Table S6** Hydrogen bonding interactions and the binding free energy of the most stable docking conformations for complexes **2–4** docked into DNA

| Complex  | H-bonding     |                  |           | $\Delta G$ (kJ mol <sup>-1</sup> ) |
|----------|---------------|------------------|-----------|------------------------------------|
|          | Donor (D–H)   | Acceptor (H...A) | H...A (Å) |                                    |
| <b>2</b> | N2-H1(ambim)  | DG-4(O)          | 3.05      | -30.25                             |
|          | N2-H1(ambim)  | DG-12(N)         | 2.84      |                                    |
|          | N3-H12(ambim) | DG-12(N)         | 3.23      |                                    |
|          | N3-H13(ambim) | DC-13(N)         | 2.24      |                                    |
|          | N3-H13(ambim) | DC-13(N)         | 2.61      |                                    |
| <b>3</b> | N2-H5(ambim)  | DG-4(O)          | 2.78      | -30.12                             |
|          | N2-H5(ambim)  | DC-13(N)         | 2.03      |                                    |
|          | N2-H5(ambim)  | DC-13(N)         | 3.21      |                                    |
| <b>4</b> | N5-H21(GSH)   | DA-17(O)         | 2.69      | -28.45                             |
|          | N6-H24(GSH)   | DC-11(O)         | 2.20      |                                    |
|          | N6-H24(GSH)   | DG-14(O)         | 2.94      |                                    |
|          | N6-H22(GSH)   | DC-15(O)         | 3.34      |                                    |

## References

- (1) A. Samanta, G. K. Ghosh, I. Mitra, S. Mukherjee, J. C. Bose. K., S. Mukhopadhyay, W. Linert and S. C. Moi, *RSC Adv.*, 2014, **4**, 43516.
- (2) N. Summa, W. Schiess and R.van Eldik, *Inorg. Chem.*, 2006, **45**, 2948.
- (3) D. Ž. Bugarčić, T. Soldatovic, R. Jelic, B. Algues and A. Grandas, *Dalton Trans.*, **2004**, 3869.
- (4) G. K. Ghosh, K. Misra, W. Linert and S. C. Moi, *Synth. React. Inorg. Met.-Org. Chem.*, 2013, **43**, 6, 714.
- (5) P. S. Sengupta, S. Ghosh and G. S. De, *Transition Met. Chem.*, 2000, **25**, 279.
- (6) R. Sinha, A. K. Choudhary and G. S. De, *Indian J. Chem.*, 2003, **42A**, 473.
- (7) P. Karmakar, B. K. Bera, K. L. Barik, S. Mukhopadhyay and A. K. Ghosh, *J. Coord. Chem.*, 2010, **63**, 2158.
